# Supplementary material for: Synthesis of Sucrose-Mimicking Disaccharide by Intramolecular Aglycone Delivery
Source: MDPI journal article supplement (doi:10.3390/molecules29081771), 2024-04-13

## Supporting Information

# Synthesis of Sucrose-Mimicking Disaccharide by Intramolecular Aglycone Delivery

Kanae Sano <sup>1</sup>, Akihiro Ishiwata <sup>2,\*</sup>, Hiroto Takamori <sup>1</sup>, Takashi Kikuma <sup>1</sup>, Katsunori Tanaka <sup>2,3</sup>, Yukishige Ito <sup>2,4</sup> and Yoichi Takeda <sup>1,\*</sup>

<sup>1</sup> Department of Biotechnology, College of Life Sciences, Ritsumeikan University, Kusatsu 525-8577, Japan; [ksano@gst.ritsumei.ac.jp](mailto:ksano@gst.ritsumei.ac.jp) (K.S.); [tkikuma@fc.ritsumei.ac.jp](mailto:tkikuma@fc.ritsumei.ac.jp) (T.K.)

<sup>2</sup> RIKEN Cluster for Pioneering Research, Wako 351-0198, Japan; [kotzenori@riken.jp](mailto:kotzenori@riken.jp) (K.T.); [yukito@chem.sci.osaka-u.ac.jp](mailto:yukito@chem.sci.osaka-u.ac.jp) (Y.I.)

<sup>3</sup> Department of Chemical Science and Engineering, Tokyo Institute of Technology, Tokyo 152-8552, Japan

<sup>4</sup> Graduate School of Science, Osaka University, Toyonaka 560-0043, Japan

\* Correspondence: [aishiwa@riken.jp](mailto:aishiwa@riken.jp) (A.I.); [yotakeda@fc.ritsumei.ac.jp](mailto:yotakeda@fc.ritsumei.ac.jp) (Y.T.)

## Contents

|                                                                                                       |   |
|-------------------------------------------------------------------------------------------------------|---|
| 1. Synthesis of allose donor <b>S1</b> .....                                                          | 2 |
| 2. Synthesis of the stereoisomer of $\text{D}$ -allosyl- $\text{D}$ -psicofuranoside derivatives..... | 3 |
| 3. $^1\text{H}$ NMR and $^{13}\text{C}$ NMR spectra of compounds.....                                 | 7 |

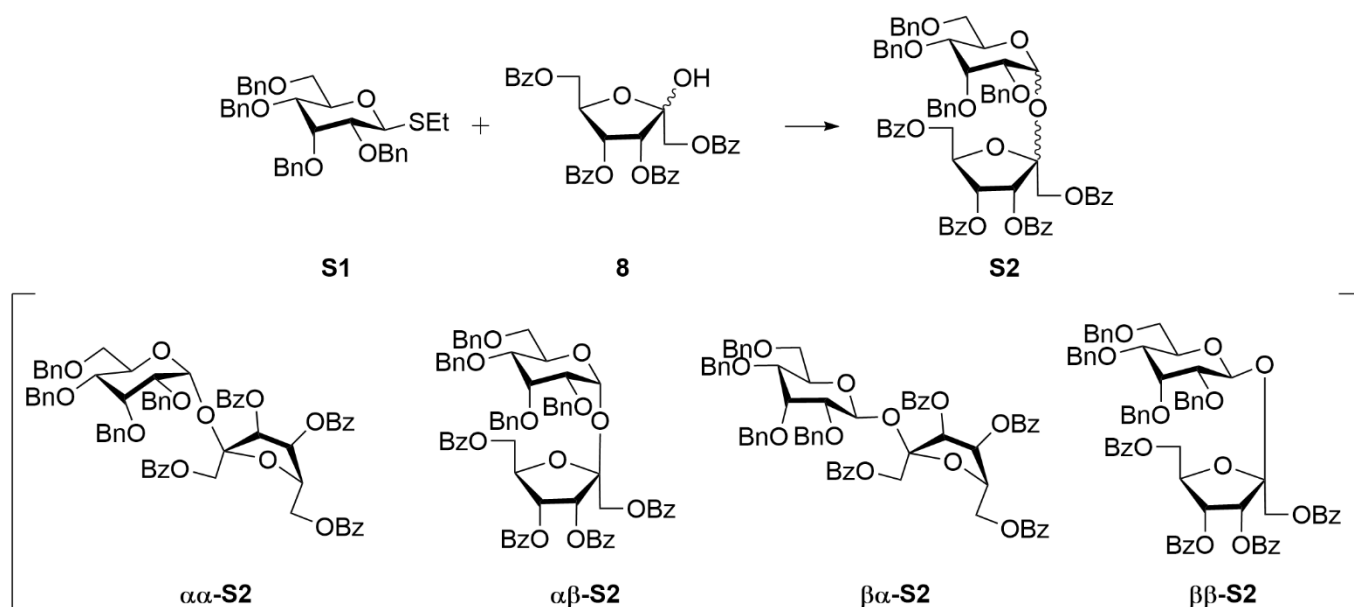

**Scheme S1.** Synthesis of the stereoisomers of D-allosyl-D-psicofuranoside derivatives **S2** by the conventional glycosylation method.

### Synthesis of allose donor **S1**

To a solution of compound **3** (1.7 g, 7.65 mmol) and benzyl bromide (7.3 mL, 61.2 mmol) in DMF (40 mL), 60% NaH (1.8 g, 45.9 mmol) was added at 0 °C. The reaction mixture was stirred at room temperature for 12 hours. The reaction was quenched by adding MeOH (excess) at 0 °C. After diluting the reaction mixture with ethyl acetate, it was washed with 1M HCl, brine, saturated aq. NaHCO<sub>3</sub>, and brine, successively. The organic layer was dried with Na<sub>2</sub>SO<sub>4</sub>, filtered, and the solvent was removed. The resulting residue was purified by flash silica gel column chromatography using hexane–ethyl acetate (5/1, v/v) to afford compound **S1** (1.56 g, 21.4 mmol, 35%). *R*<sub>f</sub> = 0.53 (hexane/ethyl acetate = 3/1, v/v); [ $\alpha$ ]<sup>24</sup><sub>D</sub> –6.20 (*c* 1.00, CHCl<sub>3</sub>), <sup>1</sup>H-NMR (400 MHz, CDCl<sub>3</sub>)  $\delta$  7.38–7.25 (m, 20H, aromatic *H*), 5.02 (d, 1H, *J* = 10.4 Hz, H-1), 4.84 (d, 1H, *J* = 12.4 Hz, CH<sub>2</sub>), 4.78 (d, 1H, *J* = 12.0 Hz, CH<sub>2</sub>), 4.57 (m, 6H, CH<sub>2</sub>), 4.40 (d, 1H, *J* = 12.0 Hz, CH<sub>2</sub>), 4.11 (t, 1H, *J* = 2.4 Hz, H-3), 4.02 (ddd, 1H, *J* = 1.6 Hz, *J* = 4.4 Hz, *J* = 6.4 Hz, *J* = 10.0 Hz, H-5), 3.75 (dd, 1H, *J* = 2.0 Hz, *J* = 11.2 Hz, H-6), 3.67 (dd, 1H, *J* = 4.4 Hz, *J* = 11.2 Hz, H-6), 3.45 (dd, 1H, *J* = 2.4 Hz, *J* = 9.6 Hz, H-4), 3.27 (dd, 1H, *J* = 2.8 Hz, *J* = 10.0 Hz, H-2), 2.73 (m, 2H, SCH<sub>2</sub>CH<sub>3</sub>), 1.31 (t, 3H, *J* = 7.6 Hz, SCH<sub>2</sub>CH<sub>3</sub>). <sup>13</sup>C-NMR (100 MHz, CDCl<sub>3</sub>)  $\delta$  138.9–127.7 (aromatic *C*), 81.5 (C-1), 78.7 (C-2), 75.6 (C-4), 74.9 (C-5), 74.2 (CH<sub>2</sub>), 73.3 (C-3, CH<sub>2</sub>), 72.3 (CH<sub>2</sub>), 71.5 (CH<sub>2</sub>), 69.4 (C-6), 24.7 (SCH<sub>2</sub>CH<sub>3</sub>), 15.1 (SCH<sub>2</sub>CH<sub>3</sub>). HRMS ESI-TOF: calcd. for C<sub>36</sub>H<sub>40</sub>NaO<sub>5</sub>S [M+Na]<sup>+</sup> 607.2489; found 607.2490.

## Synthesis of the stereoisomer of D-allosyl-D-psicofuranoside derivatives

To a solution of glycosyl donor **S1** (53 mg, 0.091 mmol), glycosyl acceptor (50 mg, 0.083 mmol), in CH<sub>2</sub>Cl<sub>2</sub> (4.0 mL) in the presence of NIS (28 mg, 0.125 mmol) and MS4Å (300 mg) was added TfOH (1.5  $\mu$ L, 0.017 mmol) and stirred at –40 °C for 1.5 hours. The triethylamine (12  $\mu$ L, 0.083 mmol) was added at –40 °C. The reaction mixture was diluted with ethyl acetate, it was washed with 1 M HCl, brine, saturated aq. NaHCO<sub>3</sub> and brine, in that order. The organic layer was dried with MgSO<sub>4</sub>, and the solvent was removed. The resulting residue was purified by gel filtration chromatography with chloroform. The di-saccharide fraction was purified by flash silica gel column chromatography with toluene–ethyl acetate (9/1, v/v) to afford compounds  $\alpha\alpha$ -**S2** ( $\alpha$ All- $\alpha$ Psi, 29 mg, 0.026 mmol, 31%) and mixture of  $\alpha\beta$ -**S2** ( $\alpha$ All- $\beta$ Psi, 6.5 mg, 0.006 mmol, 7%),  $\beta\alpha$ -**S2** ( $\beta$ All- $\alpha$ Psi, 21 mg, 0.019 mmol, 22%) and  $\beta\beta$ -**S2** ( $\beta$ All- $\beta$ Psi, 4.9 mg, 0.004 mmol, 5%). The yields of  $\alpha\beta$ -**S2**,  $\beta\alpha$ -**S2**, and  $\beta\beta$ -**S2** were calculated from the amount of mixture and the integral value of the NMR spectra.

$\alpha\alpha$ -**S2**; <sup>1</sup>H-NMR (400 MHz, CDCl<sub>3</sub>)  $\delta$  8.06–7.08 (aromatic *H*), 5.78 (d, 1H, *J* = 8.4 Hz, H-3<sup>I</sup>), 5.72 (d, 1H, *J* = 4.0 Hz, H-1<sup>II</sup>), 5.66 (dd, 1H, *J* = 6.0, 7.2 Hz, H-4<sup>I</sup>), 4.94 (broad dd, *J* = 4.6, 8.2 Hz, H-5<sup>I</sup>), 4.83 (d, 1H, *J* = 12.4 Hz, H-1<sup>I</sup>), 4.77 (d, 1H, *J* = 13.6 Hz, CH<sub>2</sub>), 4.70 (m, 3H, H-1<sup>I</sup>, H-6<sup>I</sup>, CH<sub>2</sub>), 4.53 (d, 1H, *J* = 12.4 Hz, H-6<sup>I</sup>), 4.56 (d, 2H, *J* = 13.6 Hz, CH<sub>2</sub>, CH<sub>2</sub>), 4.39 (d, 1H, *J* = 13.6 Hz, CH<sub>2</sub>), 4.22 (broad s, 1H, H-3<sup>II</sup>), 3.66 (dd, 1H, *J* = 2.0, 10.8 Hz, H-6<sup>II</sup>), 3.57 (dd, 1H, *J* = 1.6, 10.0 Hz, H-4<sup>II</sup>), 3.53 (d, 1H, *J* = 3.6 Hz, H-2<sup>II</sup>), 3.48 (broad d, 1H, *J* = 10.4 Hz, H-6<sup>II</sup>). <sup>13</sup>C-NMR (100 MHz, CDCl<sub>3</sub>)  $\delta$  166.1 (CO), 165.9 (CO), 165.6 (CO), 165.5 (CO), 139.7–127.4 (aromatic *C*), 104.1 (C-2<sup>II</sup>), 90.4 (C-1<sup>II</sup>), 79.4 (C-5<sup>I</sup>), 76.9 (C-2<sup>II</sup>), 74.6 (C-4<sup>II</sup>), 73.5 (PhCH<sub>2</sub>), 72.2 (PhCH<sub>2</sub>, C-3<sup>I</sup>), 71.6 (PhCH<sub>2</sub>), 71.0 (C-3<sup>II</sup>, PhCH<sub>2</sub>), 70.1 (C-4<sup>I</sup>), 68.5 (C-6<sup>II</sup>), 67.3 (C-5<sup>II</sup>), 64.7 (C-1<sup>I</sup>), 63.4 (C-6<sup>I</sup>).

$\alpha\beta$ -**S2**; <sup>1</sup>H-NMR (400 MHz, CDCl<sub>3</sub>)  $\delta$  8.13–6.97 (aromatic *H*), 6.24 (d, 1H, *J* = 5.2 Hz, H-3<sup>I</sup>), 5.95 (dd, 1H, *J* = 5.2, 6.4 Hz, H-4<sup>I</sup>), 5.58 (d, 1H, *J* = 3.6 Hz, H-1<sup>II</sup>), 4.95 (d, 1H, *J* = 12.0 Hz, CH<sub>2</sub>), 4.81–4.67 (m, 3H, H-5<sup>I</sup>, H-6<sup>I</sup>, H-6<sup>I</sup>), 4.14 (t, 1H, *J* = 2.4 Hz, H-3<sup>II</sup>), 3.80 (dd, 1H, *J* = 3.2, 10.4 Hz, H-6<sup>II</sup>), 3.76 (dd, *J* = 2.0, 10.4 Hz, H-6<sup>II</sup>), 3.53 (dd, 1H, *J* = 1.6, 10.4 Hz, H-4<sup>II</sup>), 3.36 (dd, 1H, *J* = 3.6, 4.8 Hz, H-2<sup>II</sup>). <sup>13</sup>C-NMR (100 MHz, CDCl<sub>3</sub>)  $\delta$  166.0–164.5 (CO), 138.7–126.8 (aromatic *C*), 107.3 (C-2<sup>I</sup>), 90.9 (C-1<sup>II</sup>), 79.7 (C-5<sup>I</sup>), 75.6 (C-2<sup>II</sup>), 74.9 (C-3<sup>I</sup>), 74.4 (C-4<sup>II</sup>), 74.3–72.8 (PhCH<sub>2</sub>, PhCH<sub>2</sub>, PhCH<sub>2</sub>), 72.2 (C-4<sup>I</sup>), 71.0 (C-3<sup>II</sup>), 70.8 (PhCH<sub>2</sub>), 67.6 (C-5<sup>II</sup>), 65.5 (C-1<sup>I</sup>), 62.8 (C-6<sup>I</sup>).

$\beta\alpha$ -**S2**; <sup>1</sup>H-NMR (400 MHz, CDCl<sub>3</sub>)  $\delta$  8.13–6.97 (aromatic *H*), 5.81 (d, 1H, *J* = 6.4 Hz, H-3<sup>I</sup>), 5.79 (dd, 1H, *J* = 2.8, 6.4 Hz, H-4<sup>I</sup>), 5.53 (d, 1H, *J* = 8.4 Hz, H-1<sup>II</sup>), 5.19 (broad q, 1H, *J* = 2.8, 5.6 Hz, H-5<sup>I</sup>), 4.72–4.27 (m, 4H, H-1<sup>I</sup>, H-1<sup>I</sup>, H-6<sup>I</sup>, H-6<sup>I</sup>), 4.16 (ddd, 1H, *J* = 1.6, 6.4, 8.0, 9.6 Hz, H-5<sup>II</sup>), 4.05 (broad t, 1H, *J* = 2.4 Hz, H-3<sup>II</sup>), 3.62 (dd, 1H, *J* = 1.6, 10.4 Hz, H-6<sup>II</sup>), 3.28 (dd, 1H, *J* = 6.4, 10.8 Hz, H-6<sup>II</sup>), 3.27–3.22 (m, 2H, H-2<sup>II</sup>, H-4<sup>II</sup>). <sup>13</sup>C-NMR (100 MHz, CDCl<sub>3</sub>)  $\delta$  166.0–164.5 (CO), 138.7–126.8 (aromatic *C*), 104.2 (C-2<sup>I</sup>), 94.8 (C-1<sup>II</sup>), 81.6 (C-5<sup>I</sup>), 78.4 (C-2<sup>II</sup>), 75.5 (C-4<sup>II</sup>), 74.7 (C-3<sup>II</sup>), 74.8 (C-3<sup>I</sup>), 74.3–72.8 (PhCH<sub>2</sub>, PhCH<sub>2</sub>, PhCH<sub>2</sub>), 72.0 (C-5<sup>II</sup>), 71.2 (PhCH<sub>2</sub>), 71.1 (C-4<sup>I</sup>), 69.9 (C-6<sup>II</sup>), 64.3 (C-1<sup>I</sup>), 62.9 (C-6<sup>I</sup>).

$\beta\beta$ -**S2**;  $^1\text{H}$ -NMR (400 MHz,  $\text{CDCl}_3$ )  $\delta$  8.00–7.00 (aromatic  $H$ ), 6.13 (d, 1H,  $J = 4.4$  Hz,  $\text{H-3}^{\text{I}}$ ), 5.96 (dd,  $J = 4.8$  Hz, 8.8 Hz,  $\text{H-4}^{\text{I}}$ ), 5.56 (d,  $J = 8.0$  Hz,  $\text{H-1}^{\text{II}}$ ), 4.86–4.37 (m, 4H,  $\text{H-1}^{\text{I}}$ ,  $\text{H-1}^{\text{I}}$ ,  $\text{H-5}^{\text{I}}$ ,  $\text{H-6}^{\text{I}}$ ), 4.08 (s, 1H,  $\text{H-3}^{\text{II}}$ ), 4.02 (ddd, 1H,  $J = 2.0, 5.0, 10.2$  Hz,  $\text{H-5}^{\text{II}}$ ), 3.70 (dd, 1H,  $J = 2.0, 11.2$  Hz,  $\text{H-6}^{\text{II}}$ ), 3.57–3.53 (m, 2H,  $\text{H-4}^{\text{II}}$ ,  $\text{H-6}^{\text{II}}$ ), 3.38 (dd,  $J = 2.4, 8.4$  Hz,  $\text{H-2}^{\text{II}}$ ).  $^{13}\text{C}$ -NMR (100 MHz,  $\text{CDCl}_3$ )  $\delta$  165.9 (CO), 165.7 (CO), 165.1 (CO), 164.6 (CO), 139.1–127.2 (aromatic  $C$ ), 107.7 ( $\text{C-2}^{\text{I}}$ ), 92.5 ( $\text{C-1}^{\text{II}}$ ), 79.1 ( $\text{C-5}^{\text{I}}$ ), 78.8 ( $\text{C-2}^{\text{II}}$ ), 74.8 ( $\text{C-3}^{\text{II}}$ ,  $\text{C-4}^{\text{II}}$ ), 74.6 ( $\text{C-3}^{\text{I}}$ ,  $\text{PhCH}_2$ ), 73.4 ( $\text{C-4}^{\text{I}}$ ,  $\text{PhCH}_2$ ), 72.9 ( $\text{C-5}^{\text{II}}$ ), 72.6 ( $\text{PhCH}_2$ ), 71.8 ( $\text{PhCH}_2$ ), 68.8 ( $\text{C-6}^{\text{II}}$ ), 65.5 ( $\text{C-1}^{\text{I}}$ ), 62.6 ( $\text{C-6}^{\text{I}}$ ).

**Table S1.**  $^{13}\text{C}$ -chemical shifts (ppm) and  $^1J_{\text{C1-H1}}$  coupling constants (Hz) for stereoisomers of  $\alpha/\beta$ -D-allopyranosyl-(1 $\rightarrow$ 2)- $\alpha/\beta$ -D-psicofuranoside derivatives ( $\text{CDCl}_3$ ).

|                              | $\alpha\alpha$ -S2 | $\alpha\beta$ -S2 | $\beta\alpha$ -S2 | $\beta\beta$ -S2 |
|------------------------------|--------------------|-------------------|-------------------|------------------|
| $\delta_{\text{C}}$ D-allo 1 | 90.4               | 90.9              | 94.8              | 92.5             |
| 2                            | 76.9               | 75.6              | 78.4              | 78.8             |
| 3                            | 71.0               | 71.0              | 74.7              | 74.8             |
| 4                            | 74.6               | 74.4              | 75.5              | 74.8             |
| 5                            | 67.3               | 67.6              | 72.0              | 72.9             |
| 6                            | 68.5               | 68.7              | 69.9              | 68.8             |
| D-psico 1                    | 64.7               | 65.5              | 64.3              | 65.5             |
| 2                            | 104.1              | 107.3             | 104.2             | 107.7            |
| 3                            | 72.2               | 74.9              | 74.8              | 74.6             |
| 4                            | 70.1               | 72.2              | 71.1              | 73.4             |
| 5                            | 79.4               | 79.7              | 81.6              | 79.1             |
| 6                            | 63.4               | 62.8              | 62.9              | 62.6             |
| $J_{\text{C1-H1}}$ (allo)    | 177.0              | 170.0             | 172.0             | 172–174          |

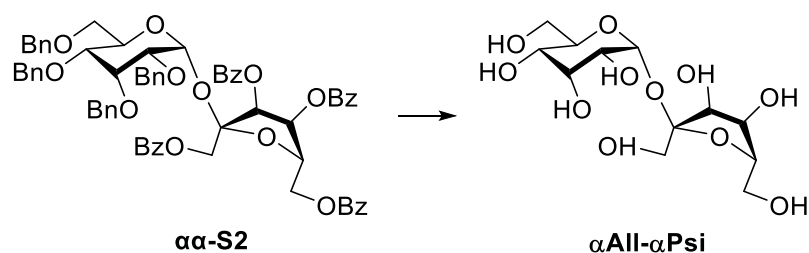

**Scheme S2.** Deprotection of  $\alpha$ -D-allosyl-(1 $\rightarrow$ 2)- $\alpha$ -D-psicofuranoside derivative.

To a solution of the  $\alpha\text{-S2}$  (29 mg, 0.026 mmol) in MeOH (1.0 mL) and THF (1.0 mL) was added 1 M NaOMe in MeOH (26  $\mu$ L) at 0 °C. The reaction mixture was stirred at room temperature for 12 hours, and neutralized with Amberlyst, filtered, and concentrated *in vacuo*. The resulting residue was purified by flash silica gel column chromatography with chloroform–MeOH (85/15, *v/v*) to afford intermediate (6.9 mg, 0.019 mmol, 73%). To a solution of the intermediate in H<sub>2</sub>O (5.0 mL) was stirred in the presence of Pd(OH)<sub>2</sub>/C (15 mg) at 40 °C under H<sub>2</sub> atmosphere for 1 day. The reaction mixture was filtered through celite. The filtrate was lyophilized. The residue was purified by C18 reversed-phase column chromatography (H<sub>2</sub>O) to give deprotected product (6.9 mg, 0.019 mmol, 73%). <sup>1</sup>H-NMR (400 MHz, CDCl<sub>3</sub>)  $\delta$  5.36 (d, 1H,  $J$  = 4.0 Hz, H-1<sup>II</sup>), 4.48 (d, 1H,  $J$  = 6.4 Hz, H-3<sup>I</sup>), 4.21–4.19 (m, 1H, H-5<sup>I</sup>), 4.09 (t, 1H,  $J$  = 6.8 Hz, H-3<sup>II</sup>), 4.05 (dd, 1H,  $J$  = 1.2, 6.0 Hz, H-4<sup>I</sup>), 3.88 (td, 1H,  $J$  = 2.5, 5.6, 10.4 Hz, H-5<sup>II</sup>), 3.91–3.82 (m, 2H, H-1<sup>I</sup>, H-6<sup>II</sup>), 3.77 (t, 1H,  $J$  = 3.6 Hz, H-2<sup>II</sup>), 3.73–3.63 (m, 3H, H-1<sup>I</sup>, H-6<sup>I</sup>, H-6<sup>II</sup>), 3.58 (dd, 1H,  $J$  = 2.8, 10.8 Hz, H-4<sup>II</sup>). <sup>13</sup>C-NMR (100 MHz, CDCl<sub>3</sub>)  $\delta$  106.2 (C-2<sup>I</sup>), 90.4 (C-1<sup>I</sup>), 85.4 (C-5<sup>I</sup>), 70.8 (C-3<sup>I</sup>, C-3<sup>II</sup>), 70.7 (C-4<sup>I</sup>), 67.5 (C-5<sup>II</sup>), 66.6 (C-2<sup>II</sup>), 66.0 (C-4<sup>II</sup>), 61.6 (C-6<sup>I</sup>), 60.7 (C-1<sup>I</sup>), 60.2 (C-6<sup>II</sup>).

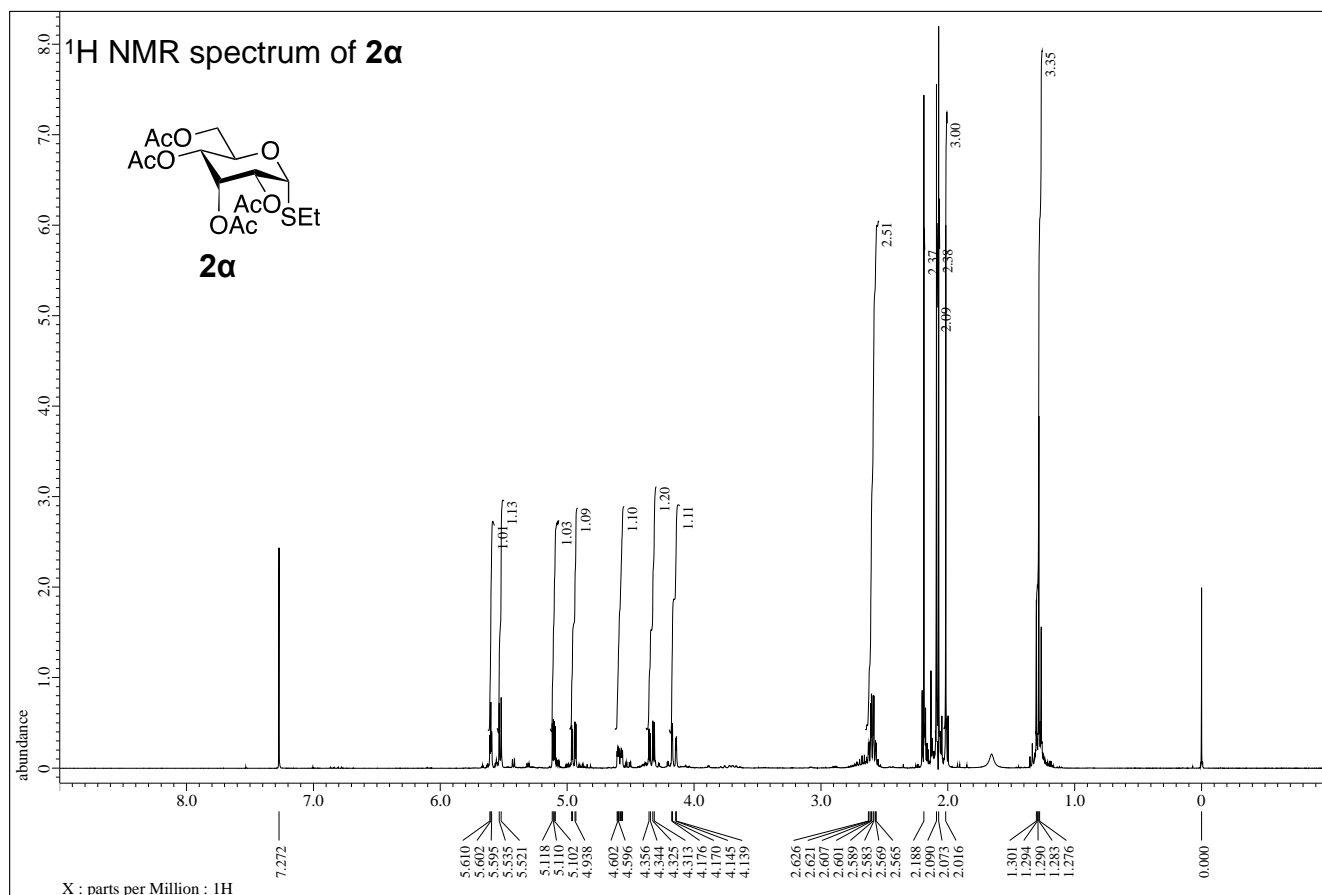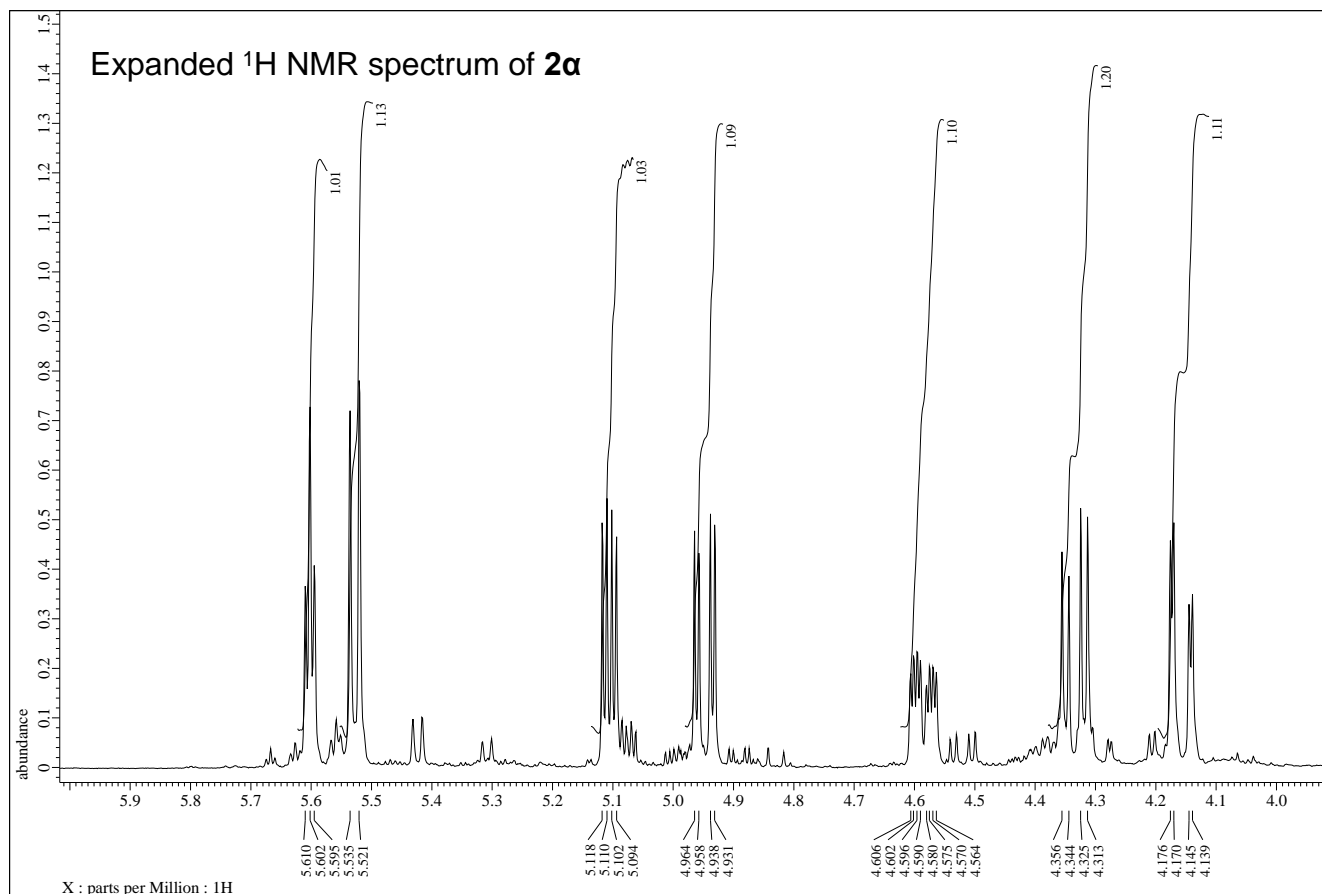



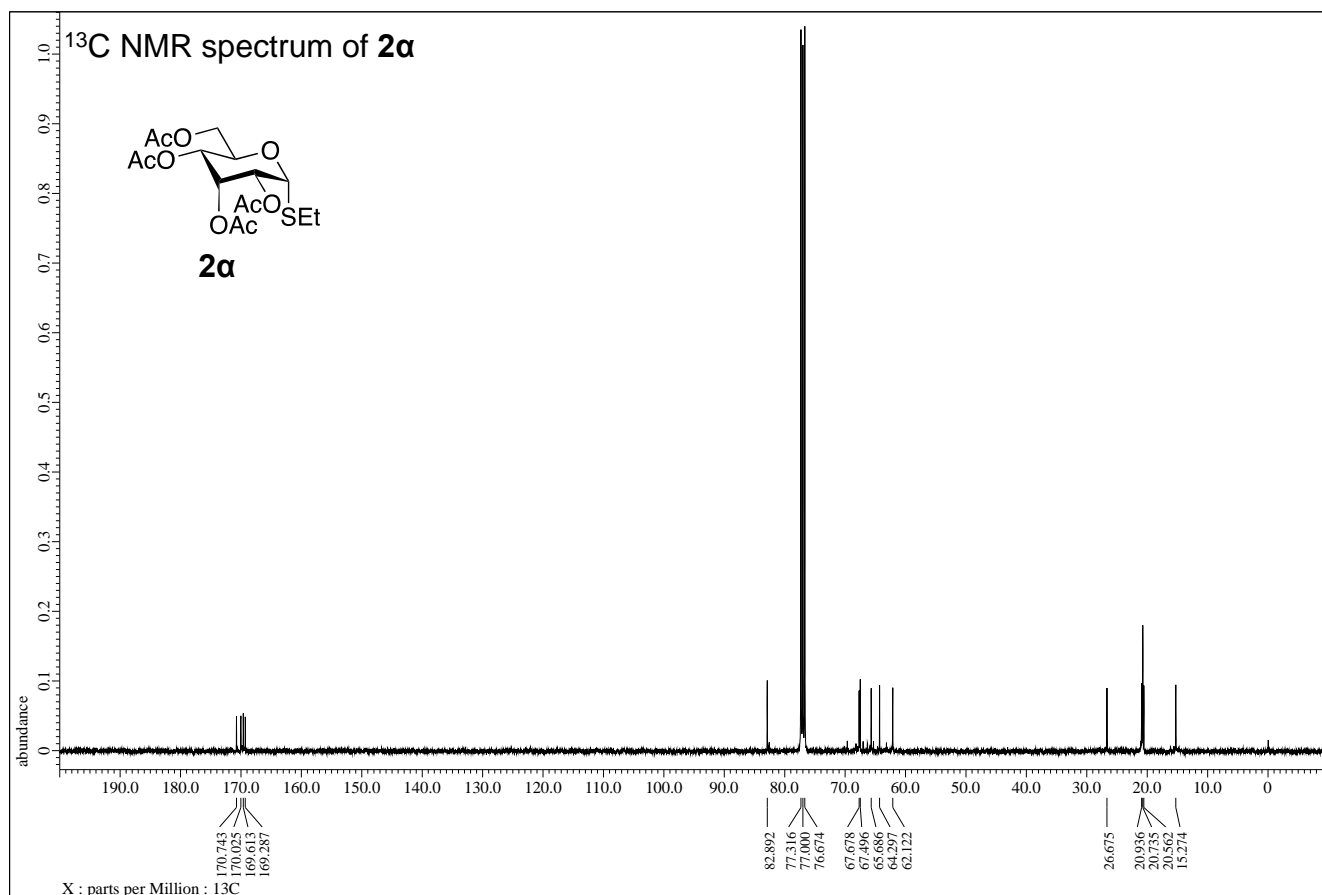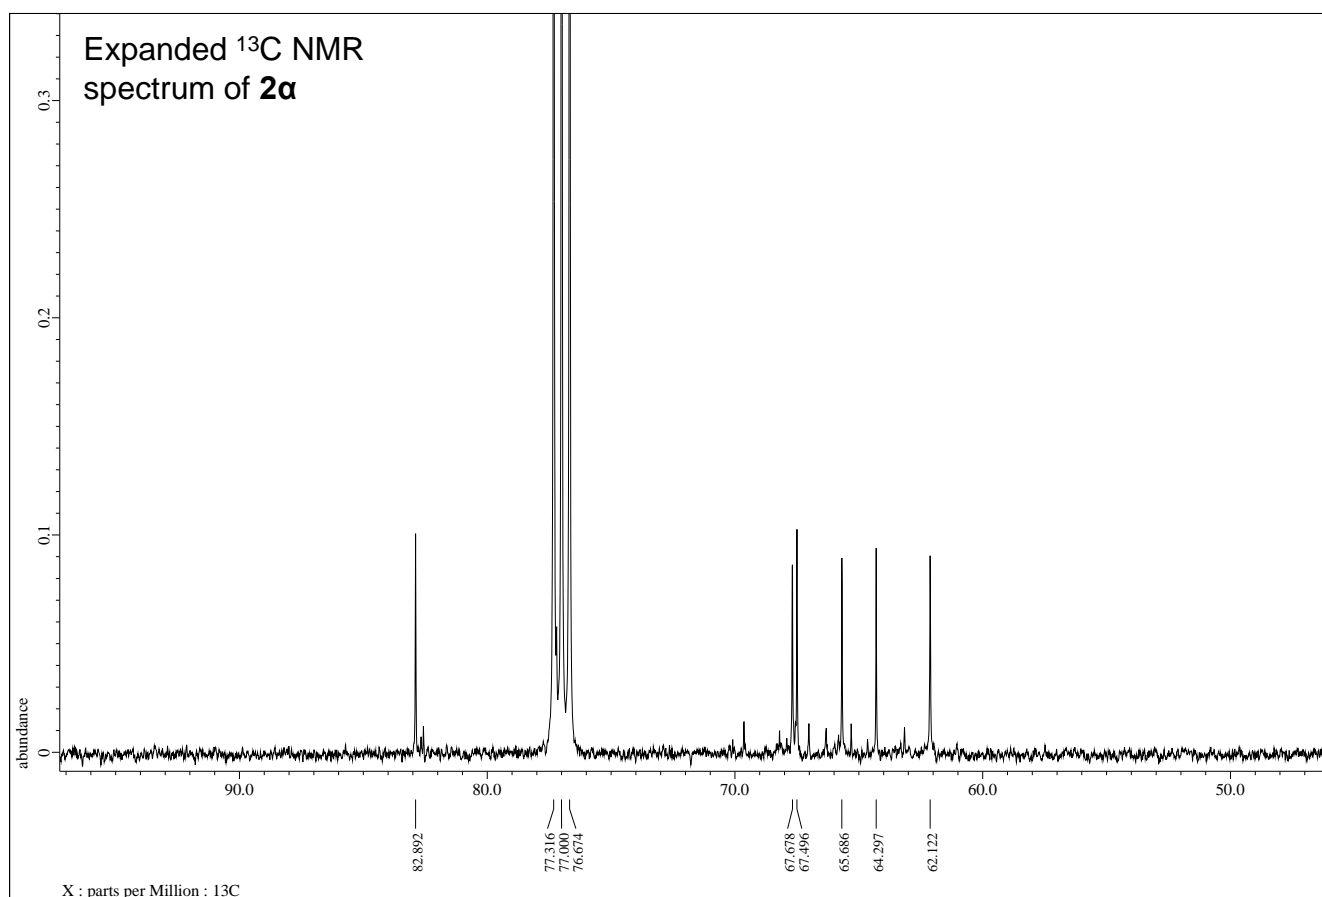

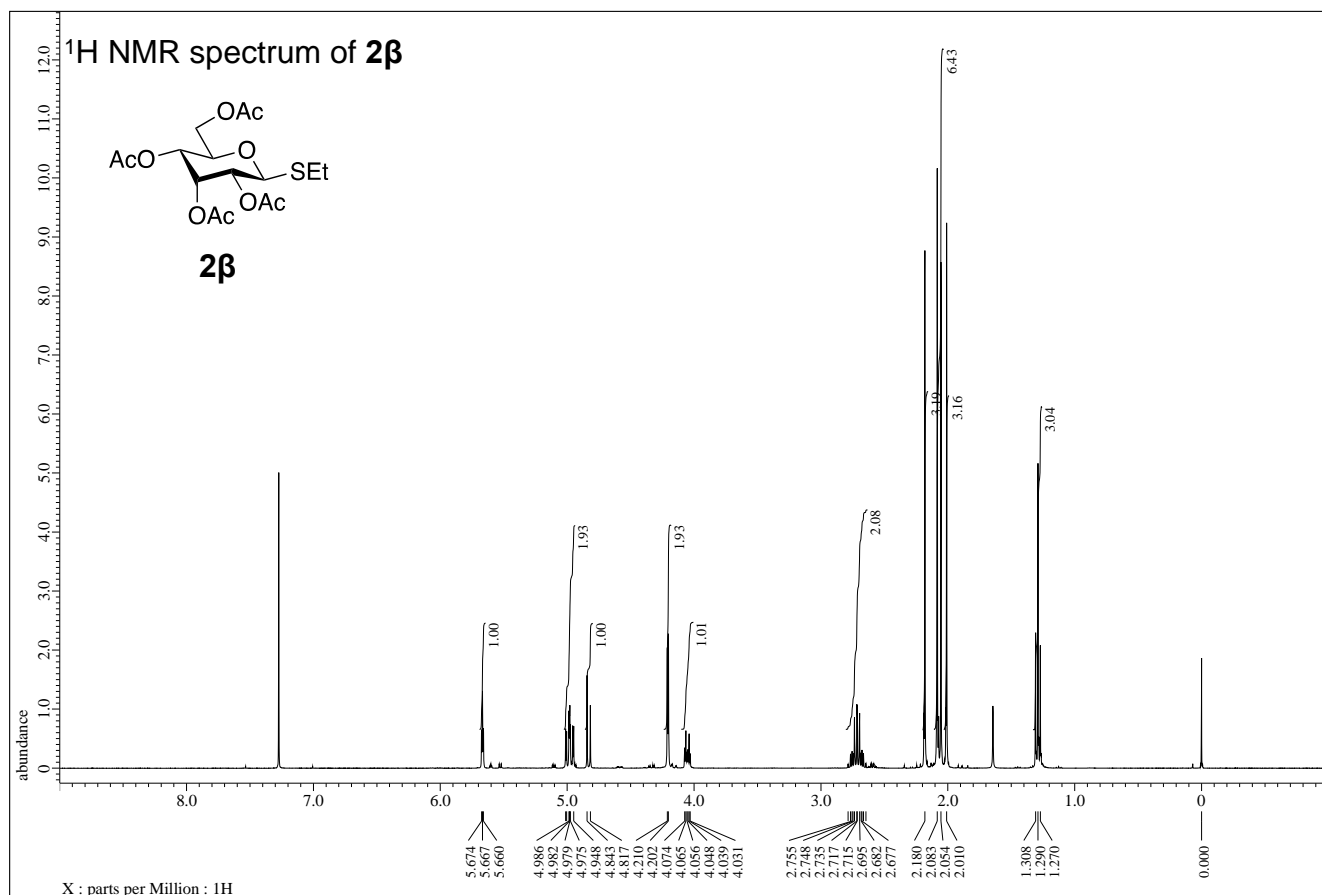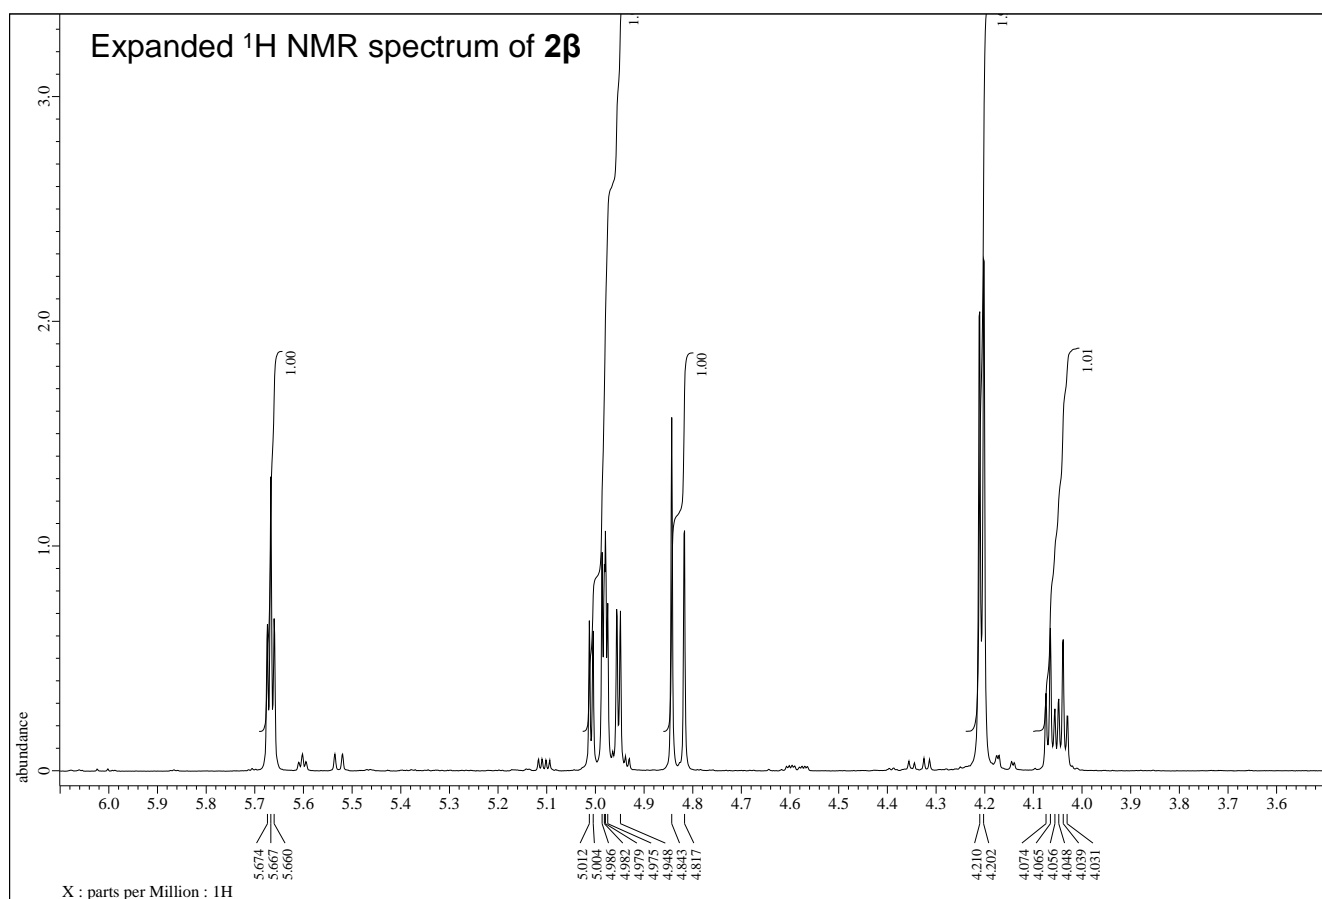

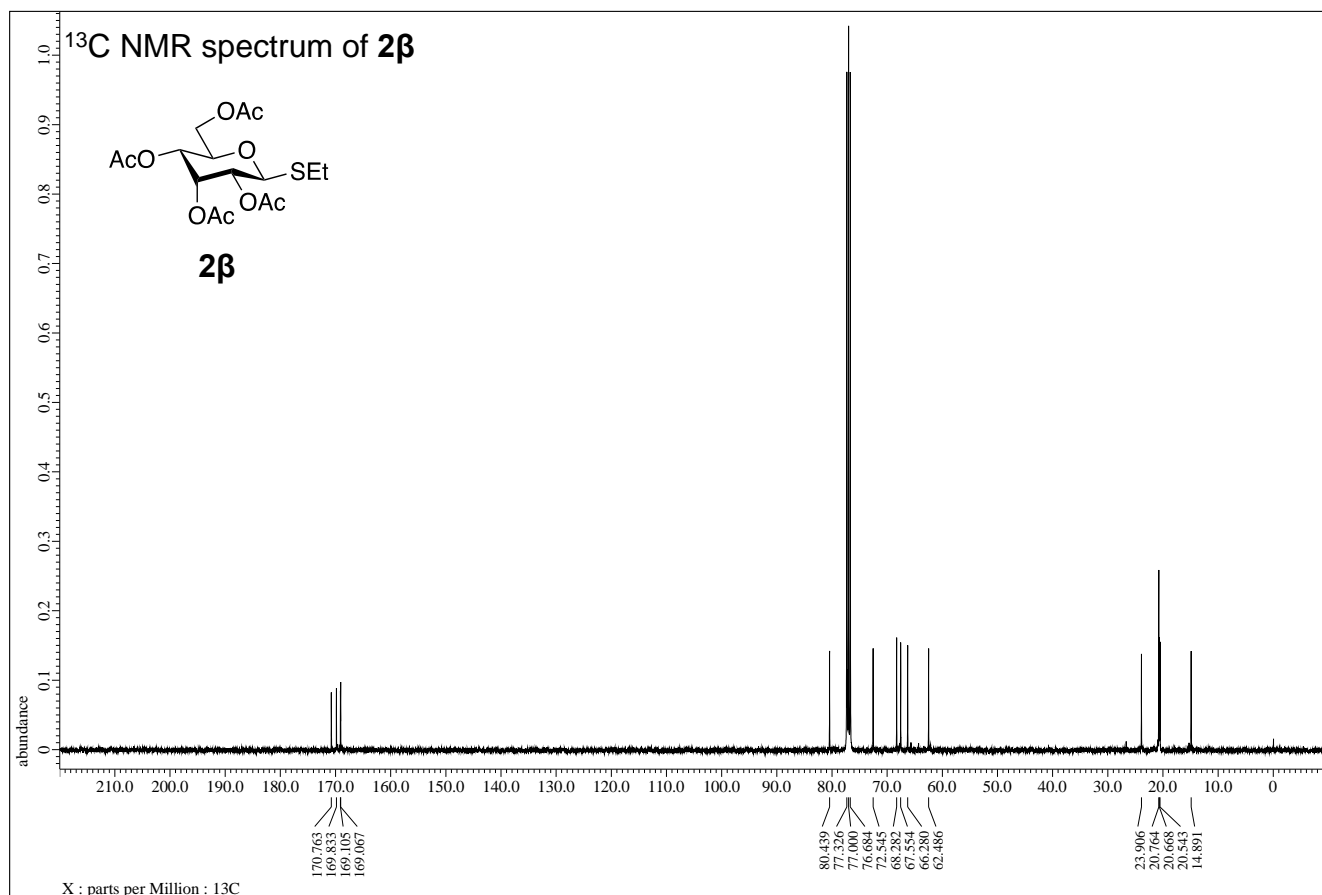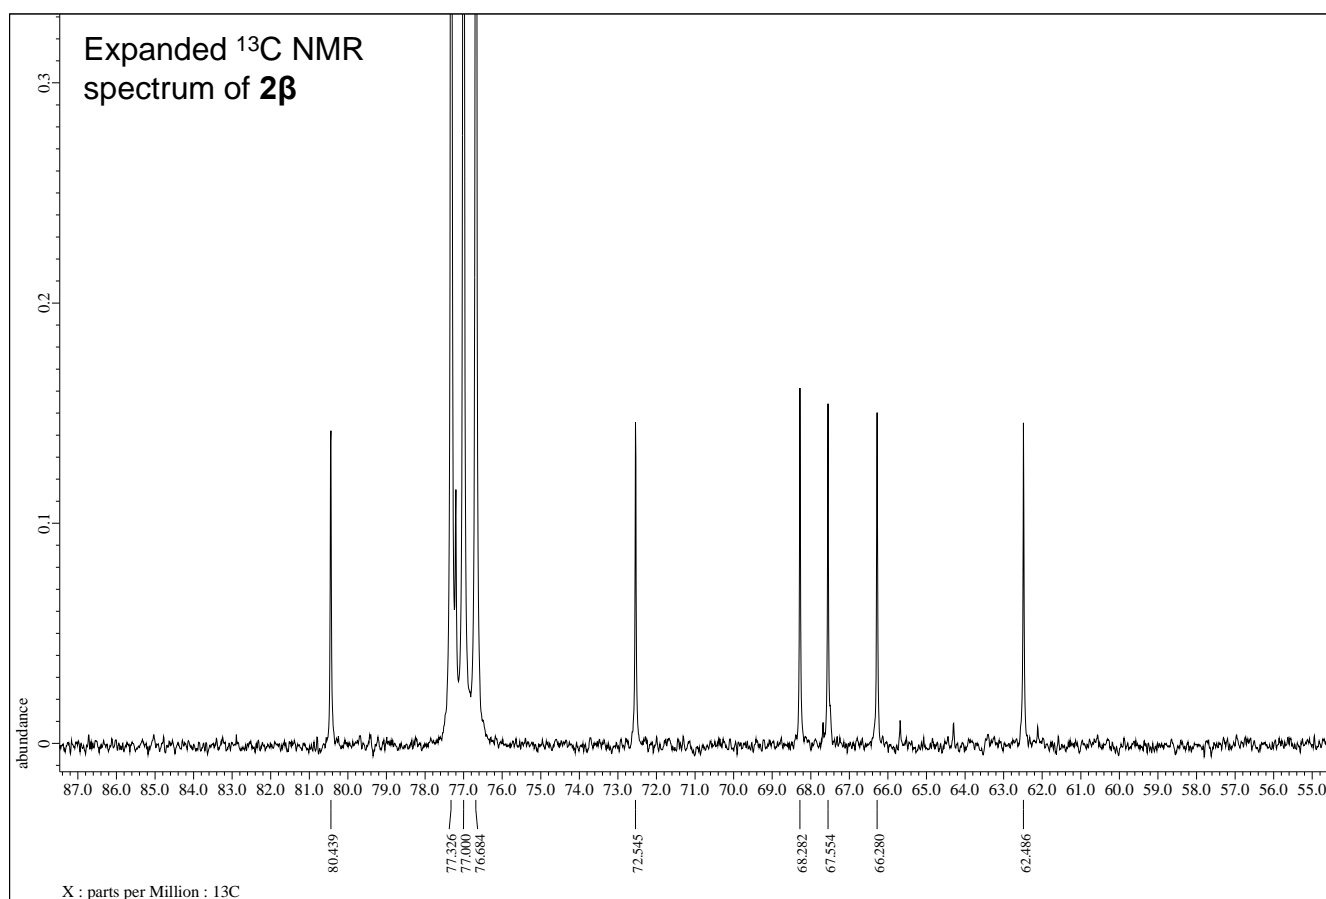

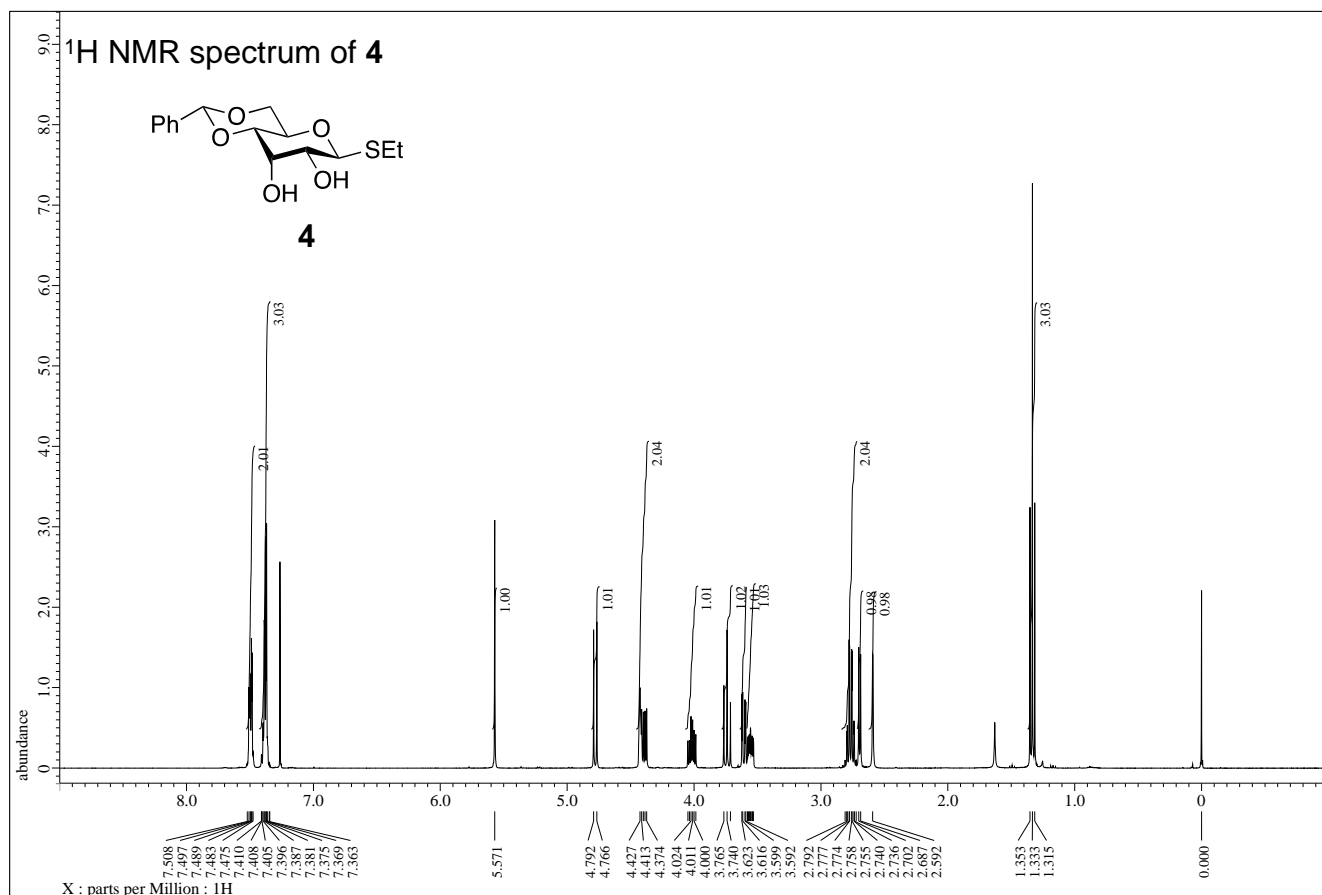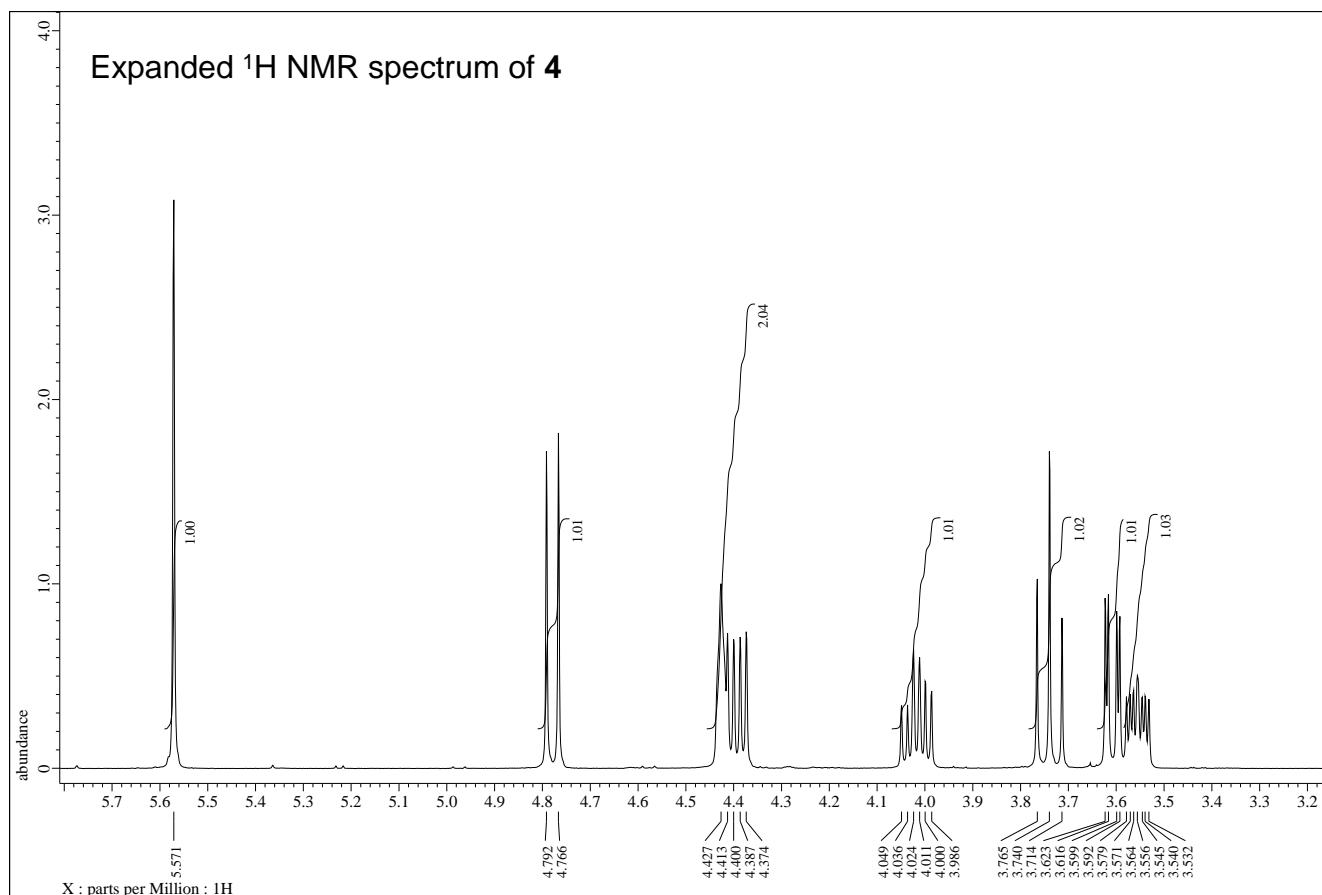

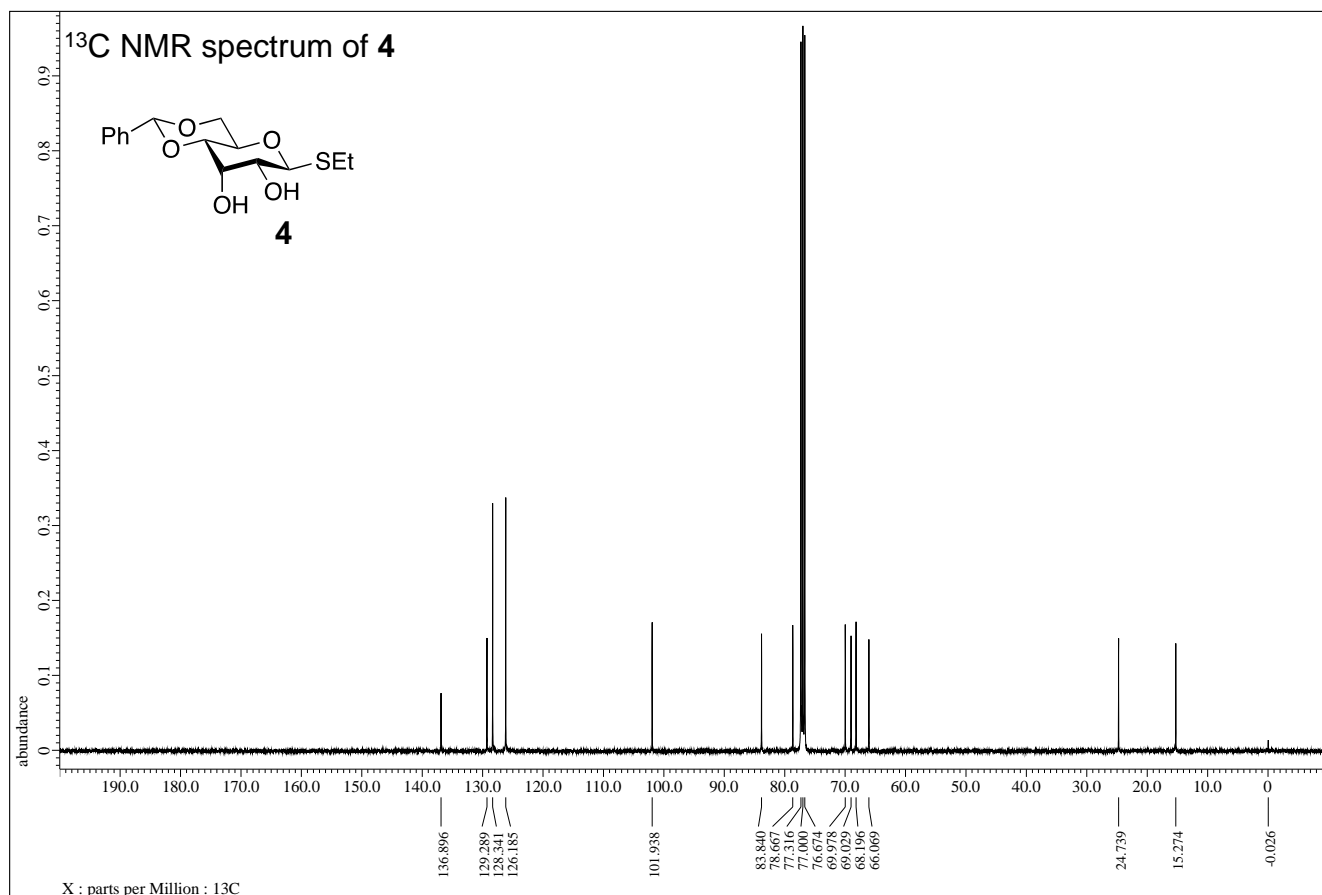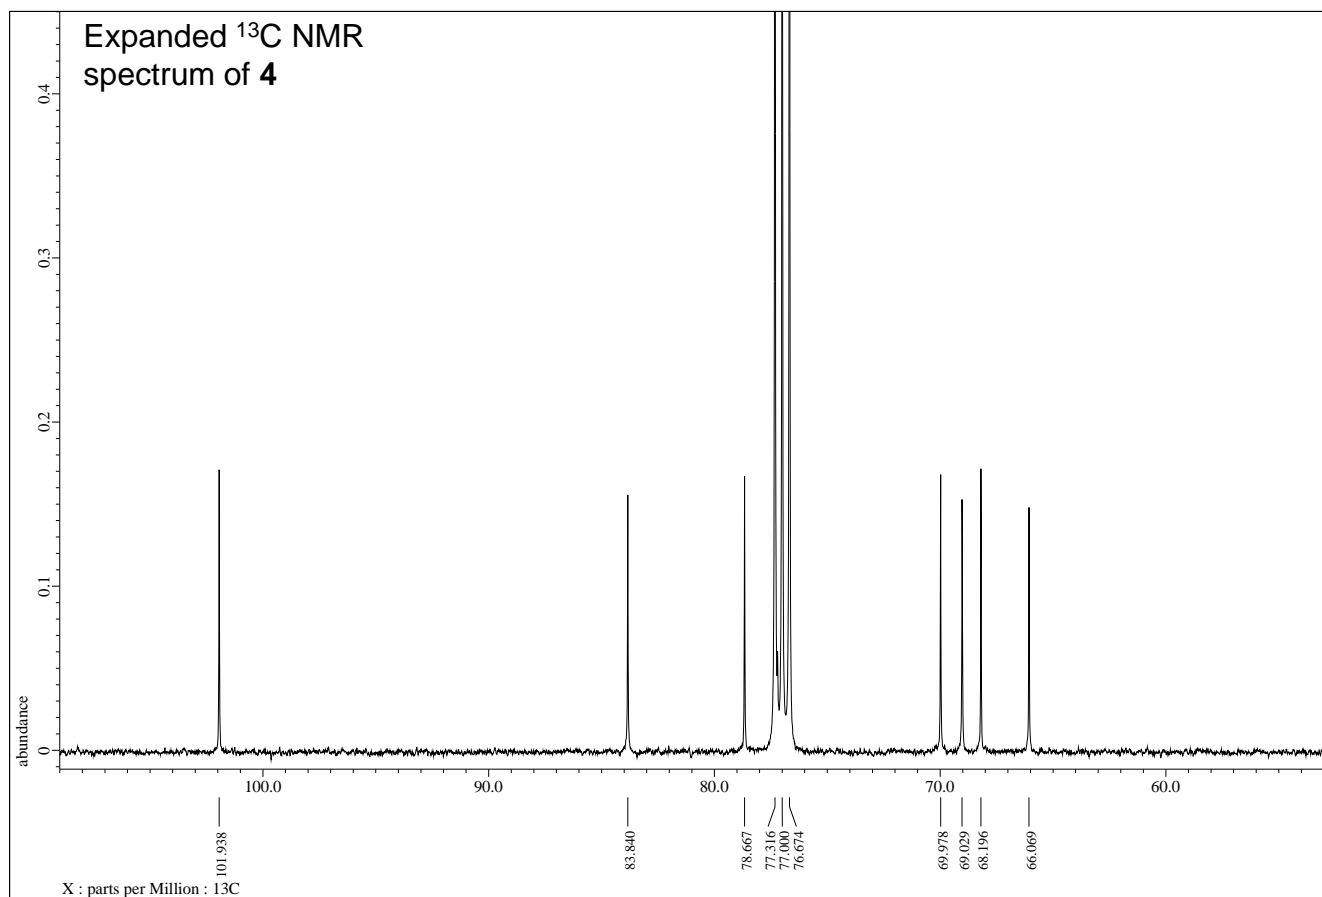

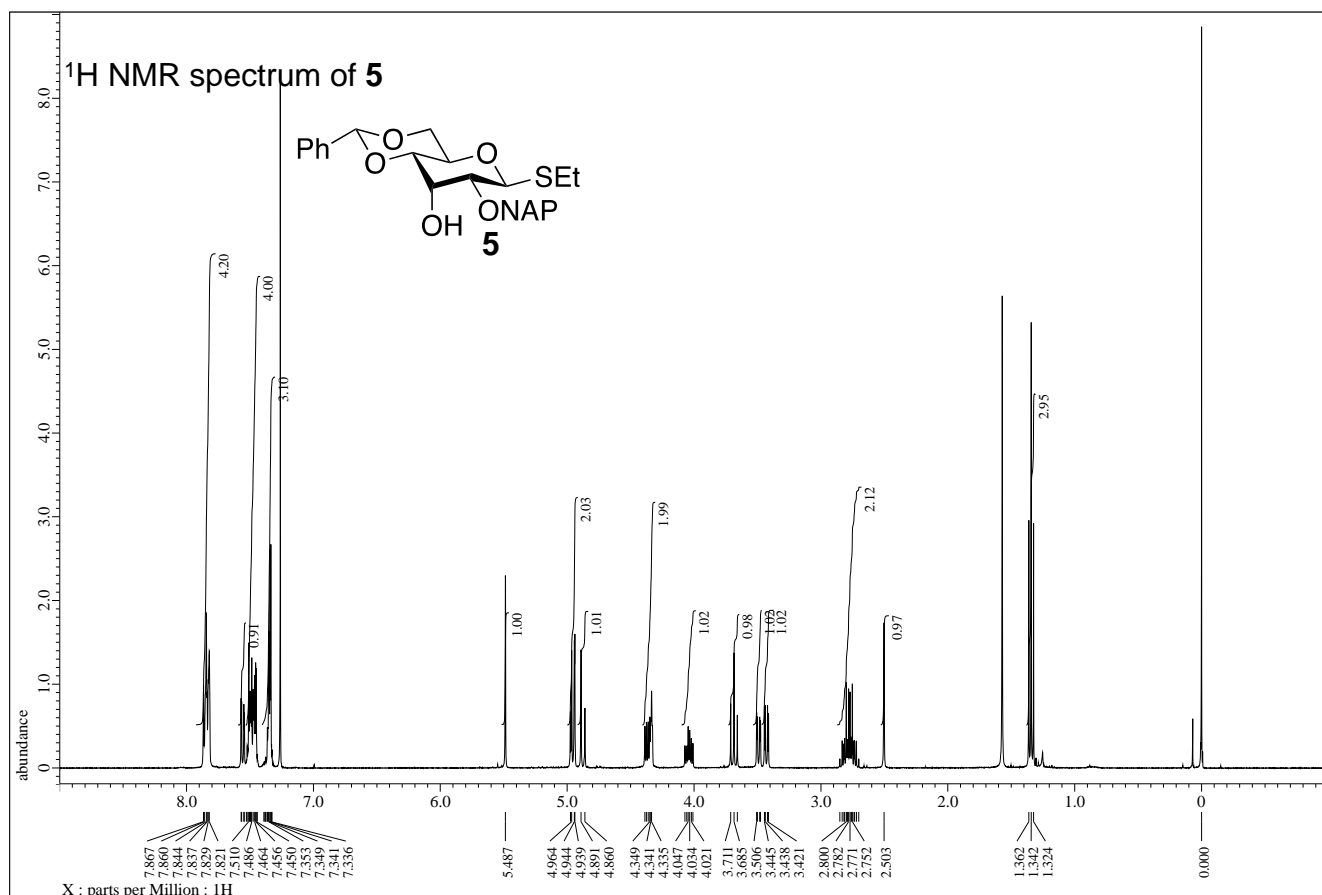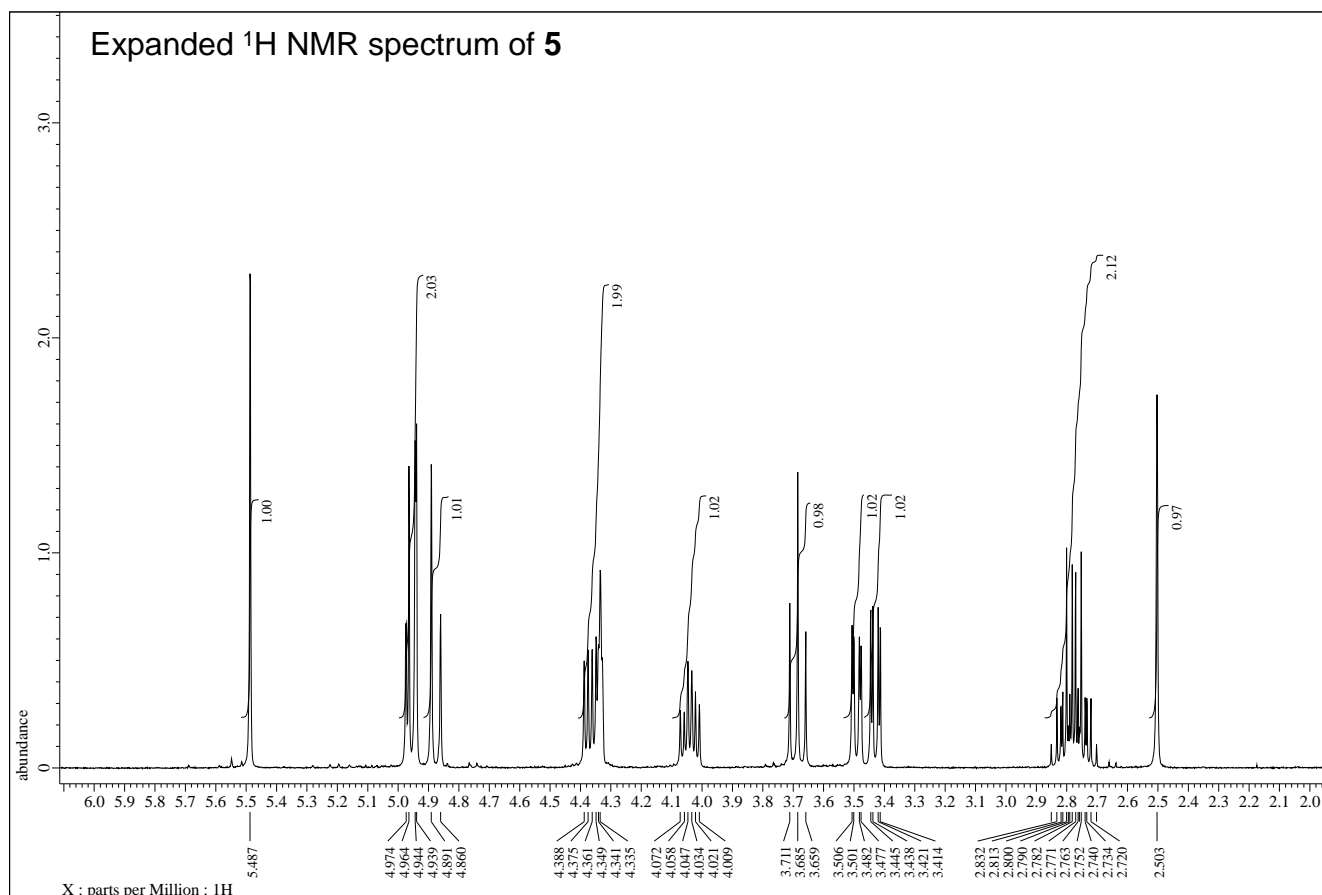

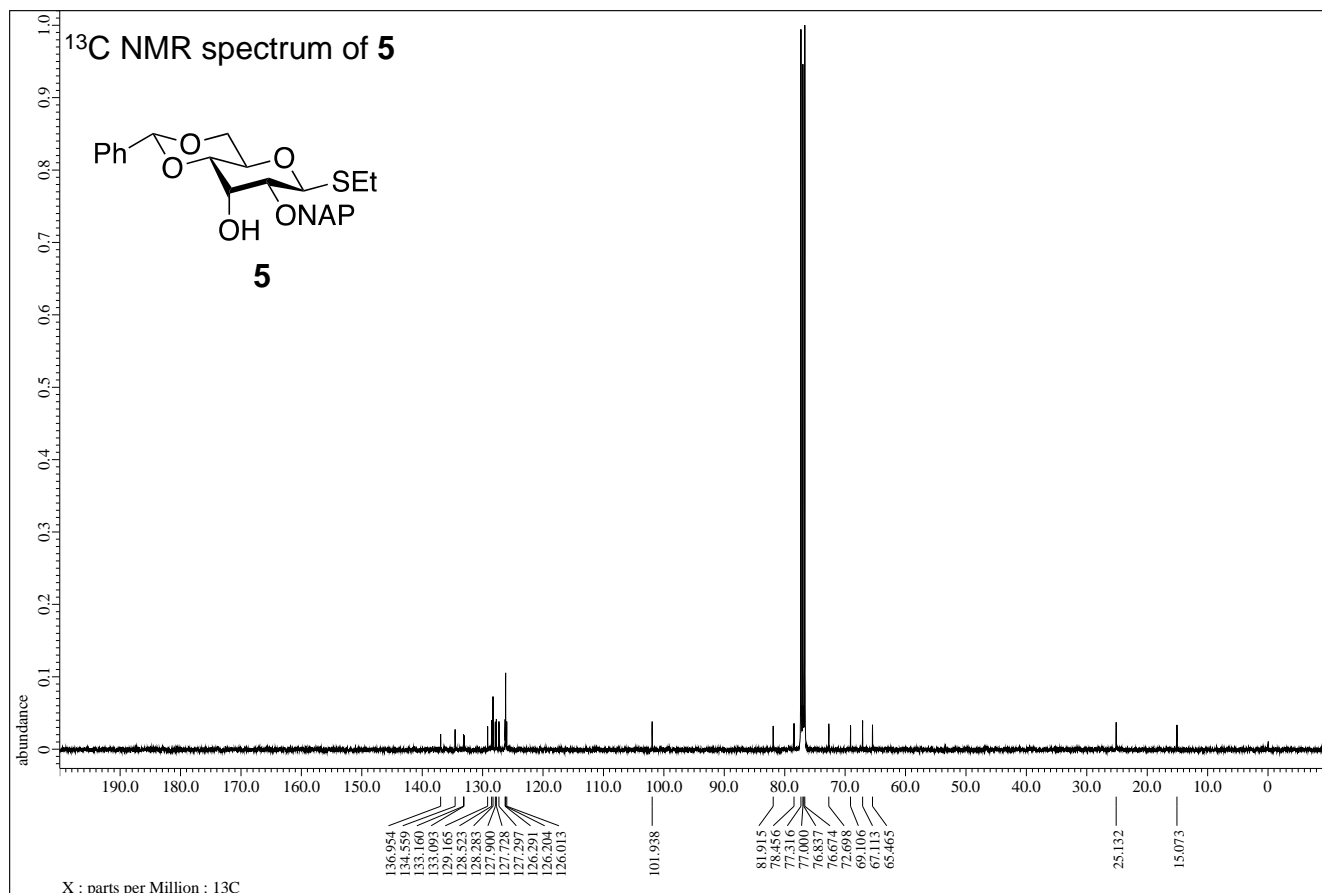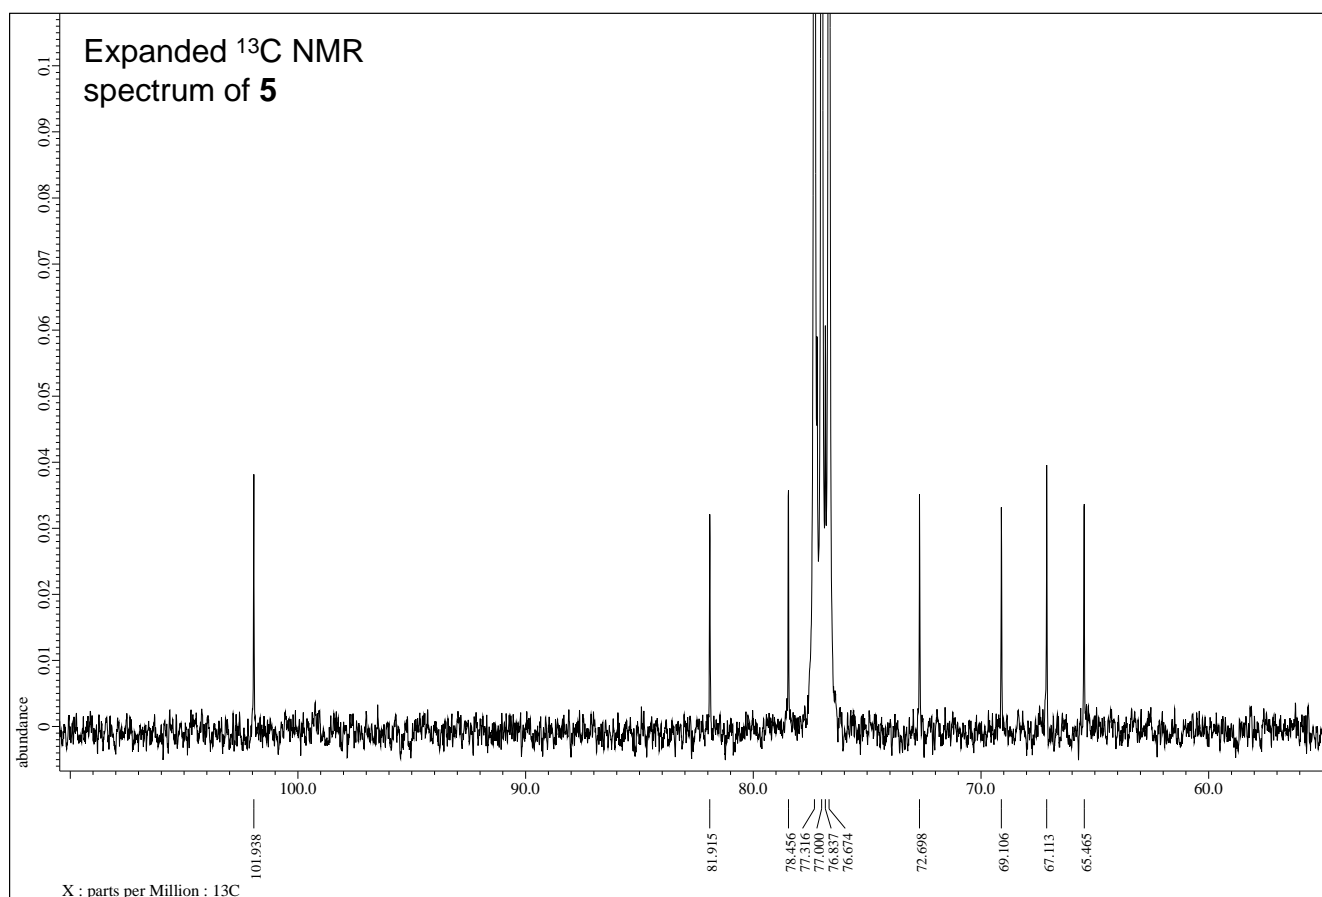

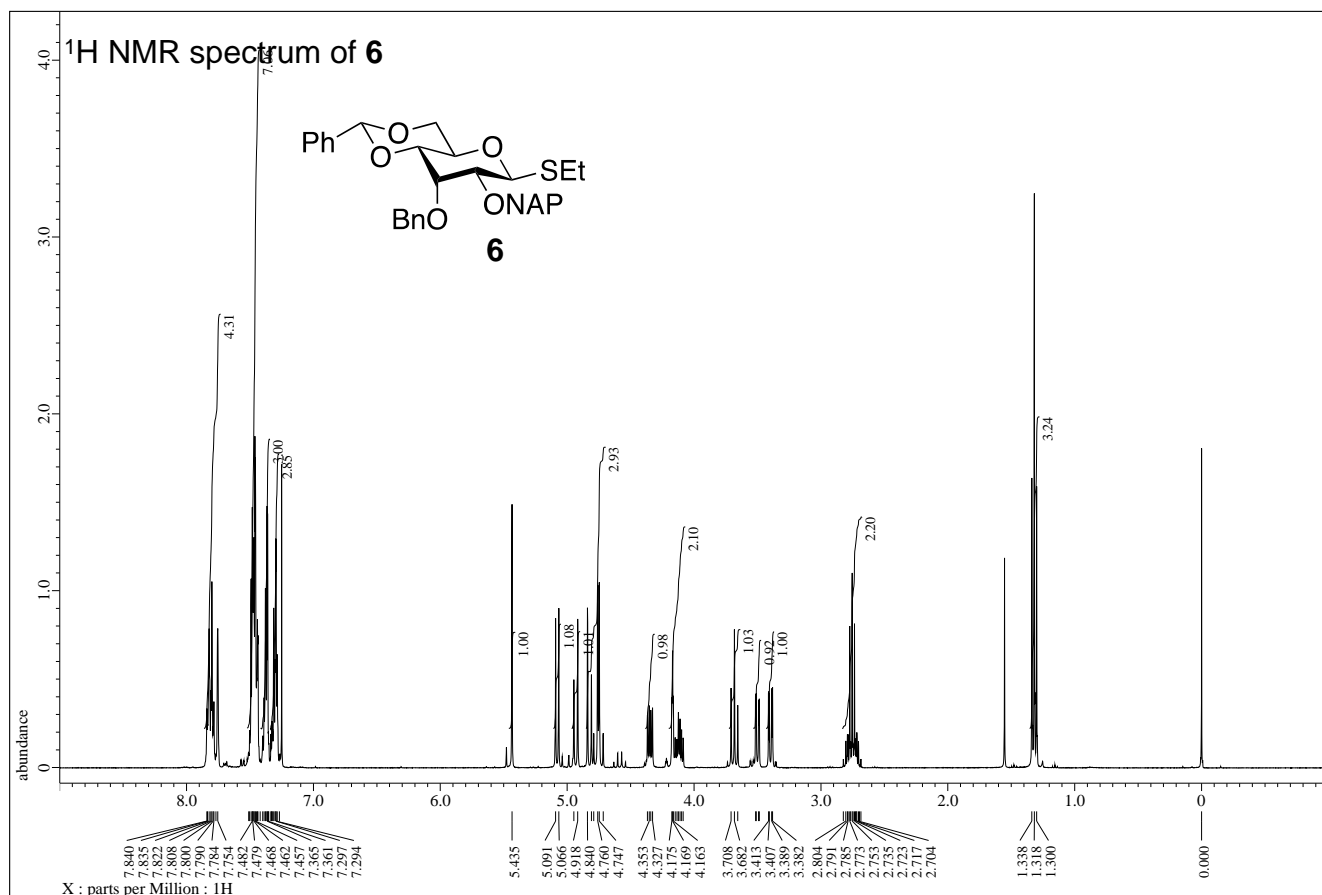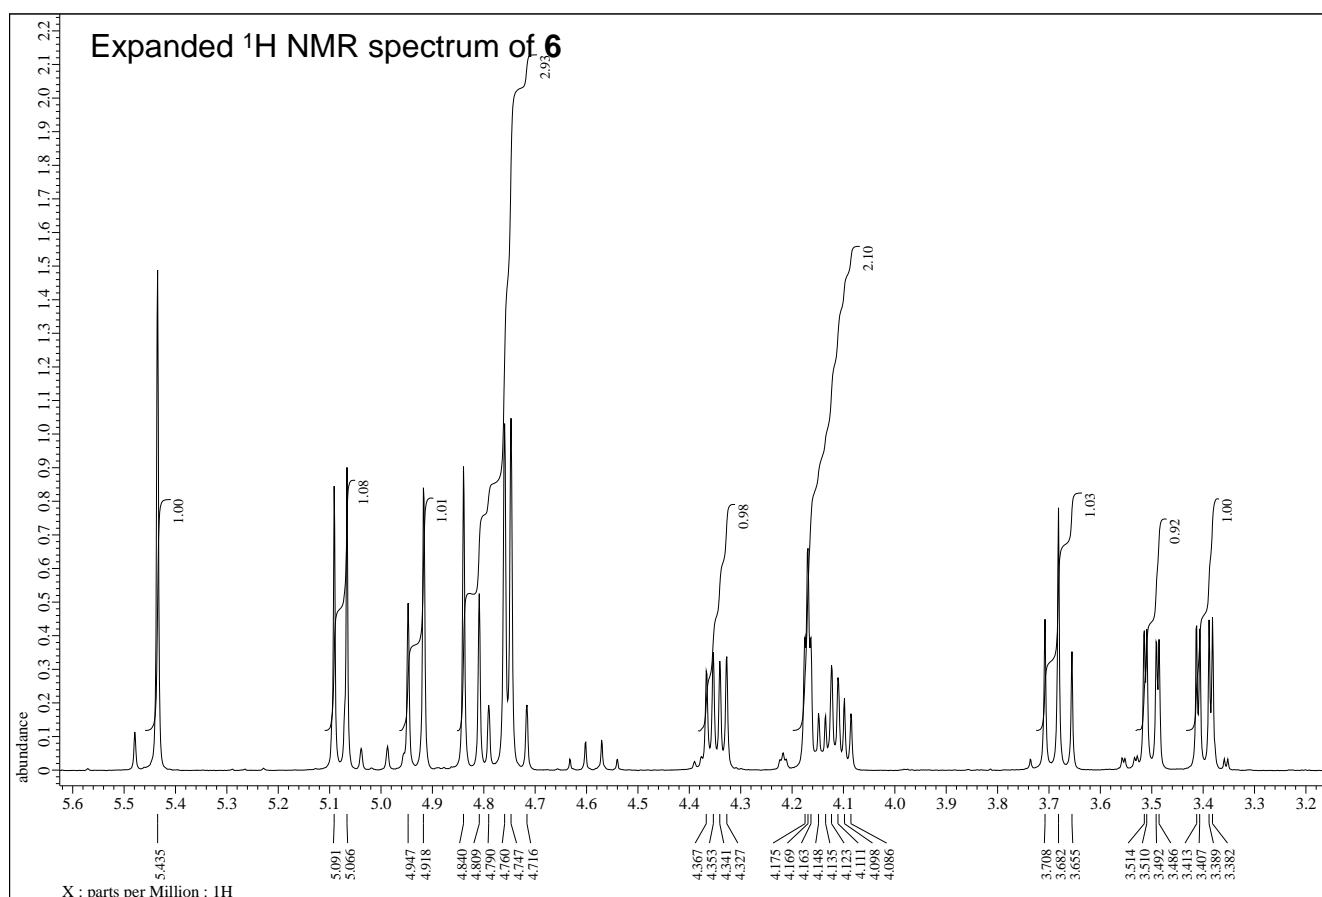



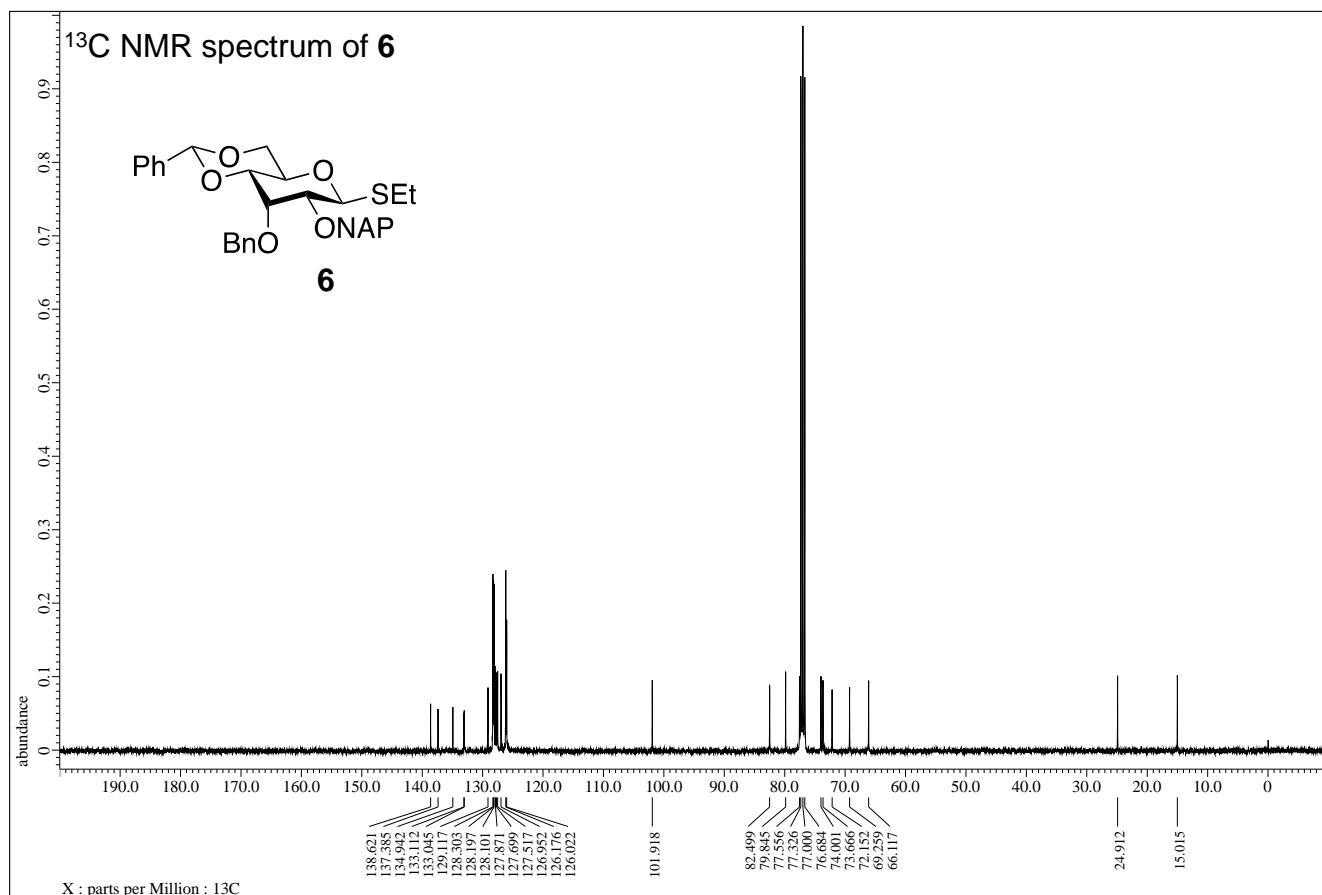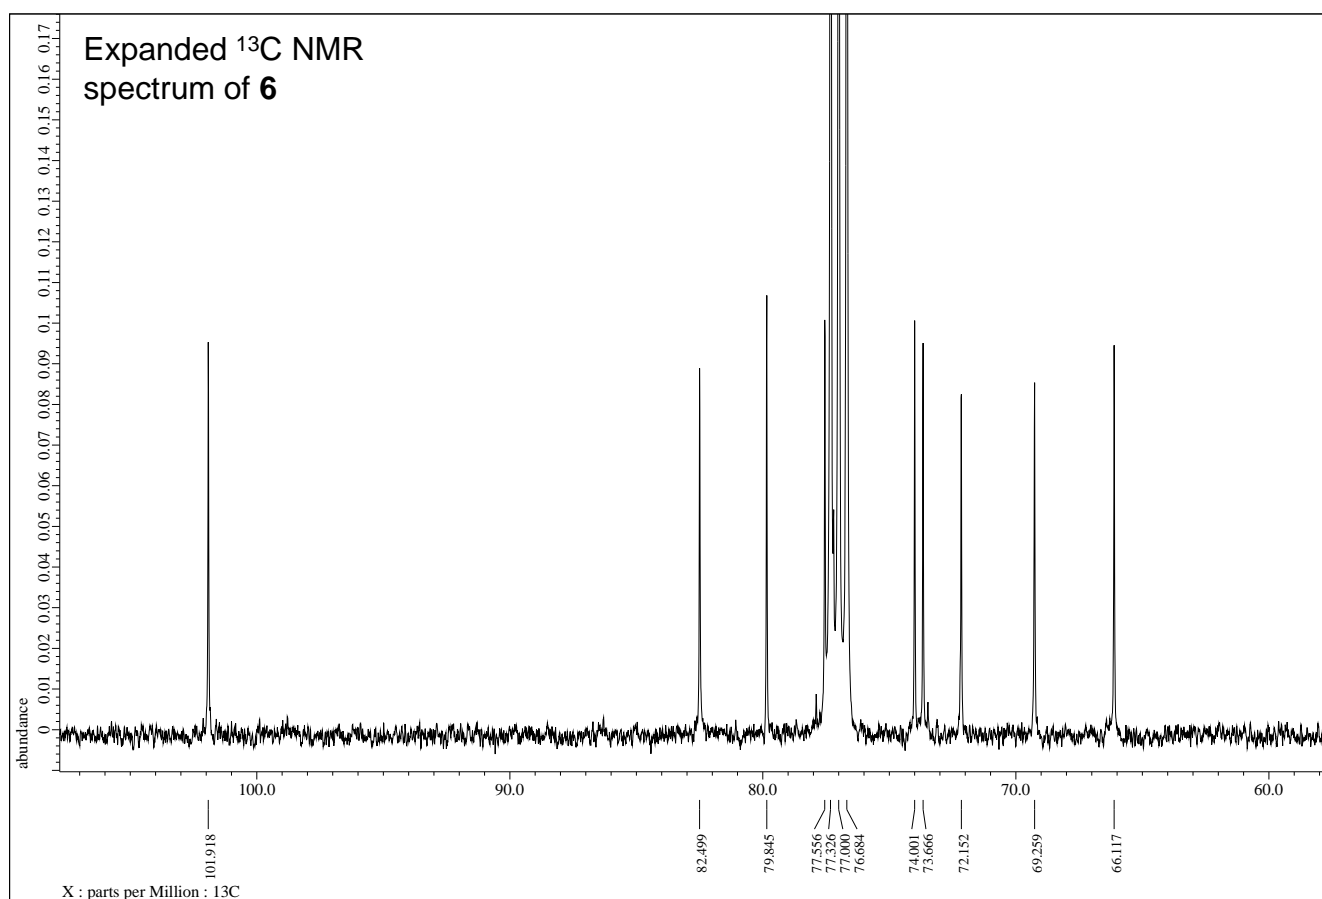

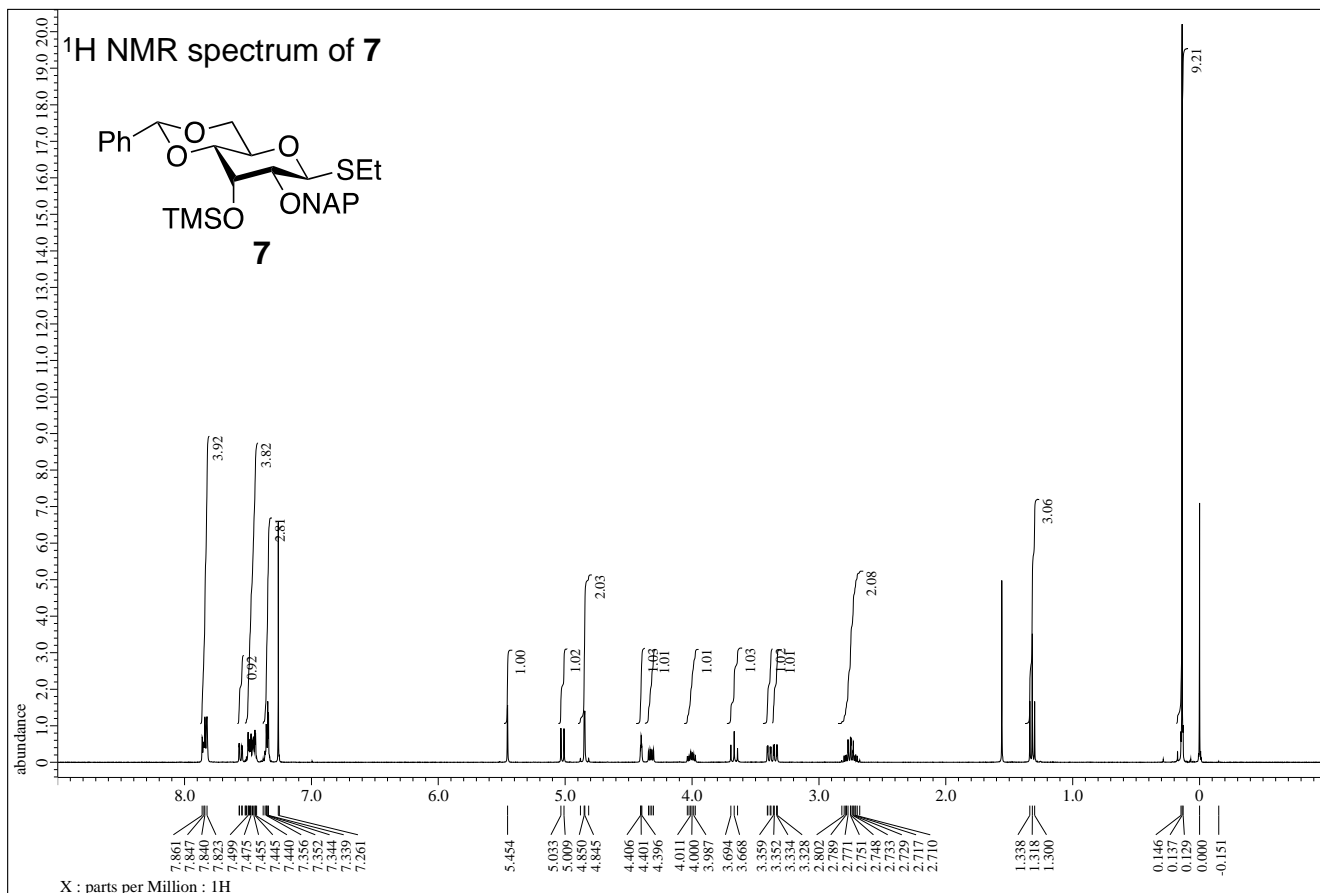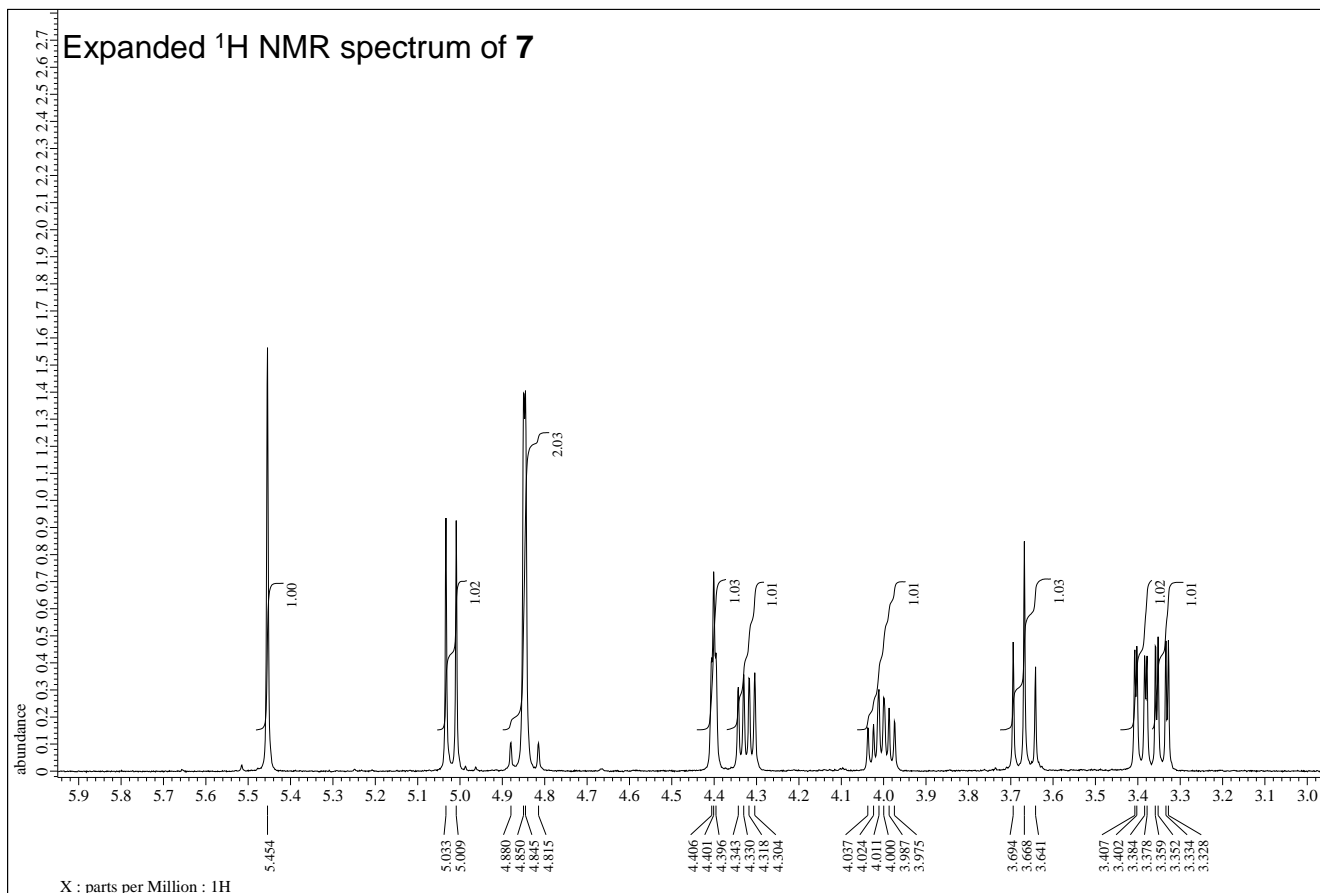

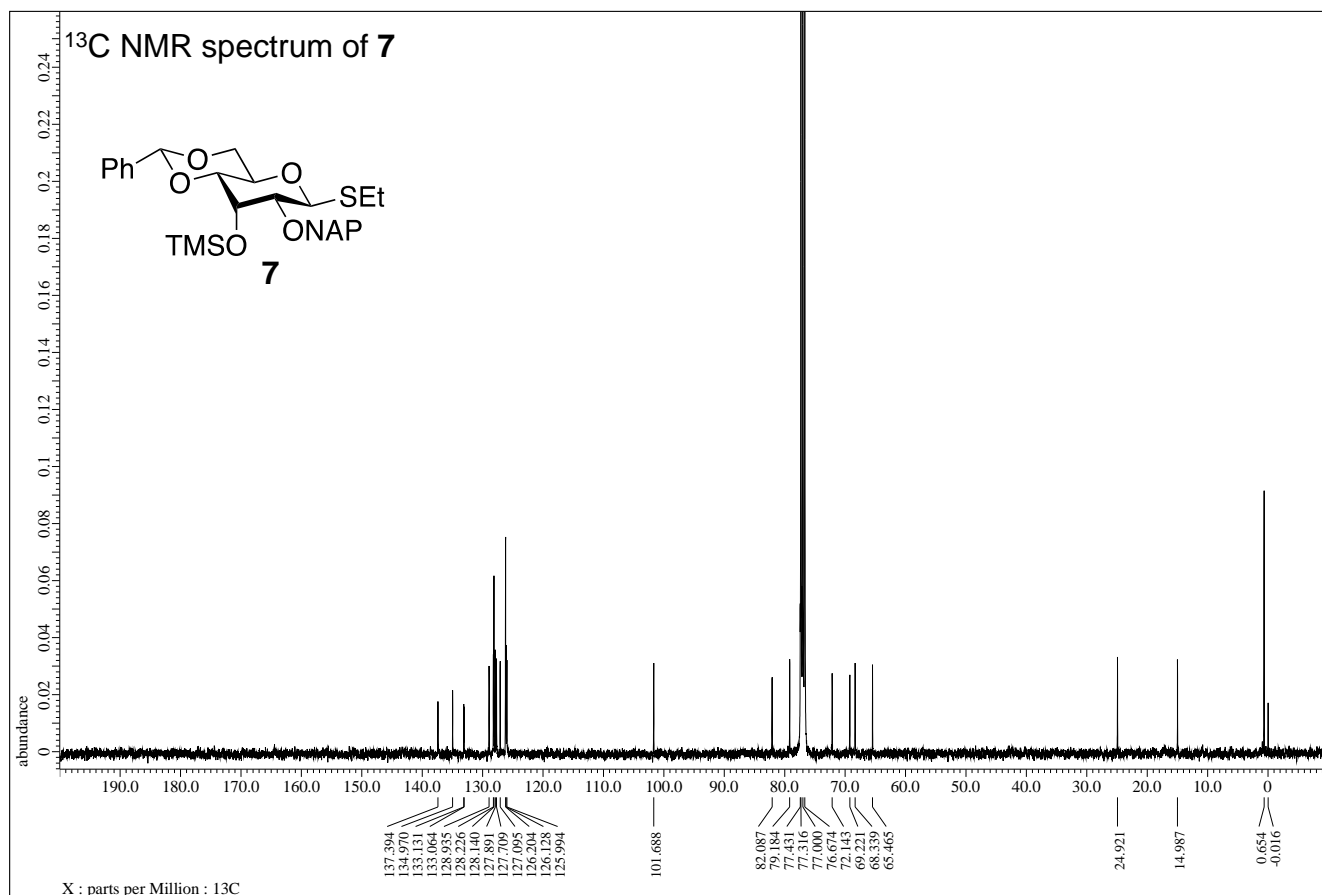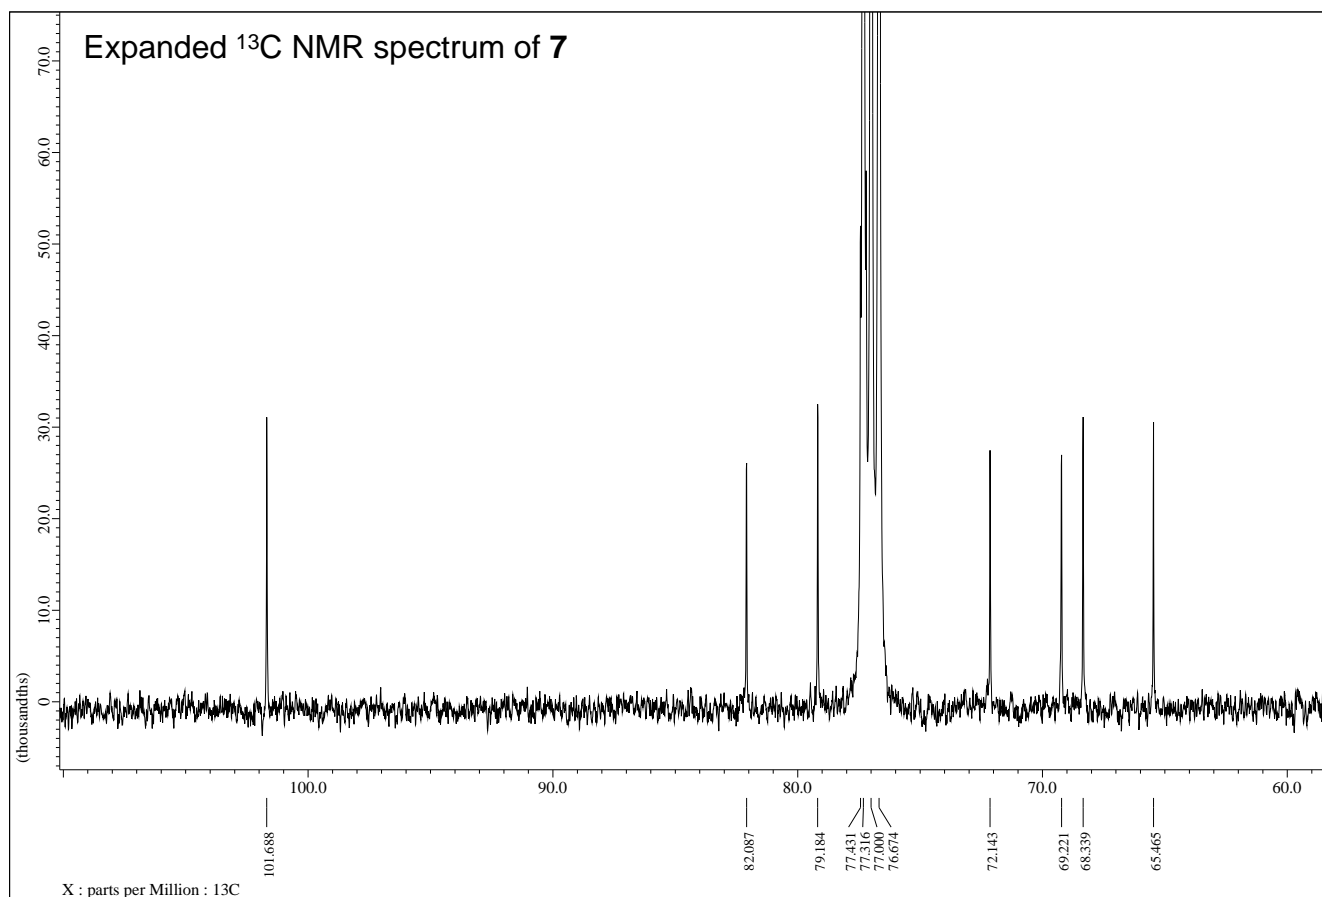

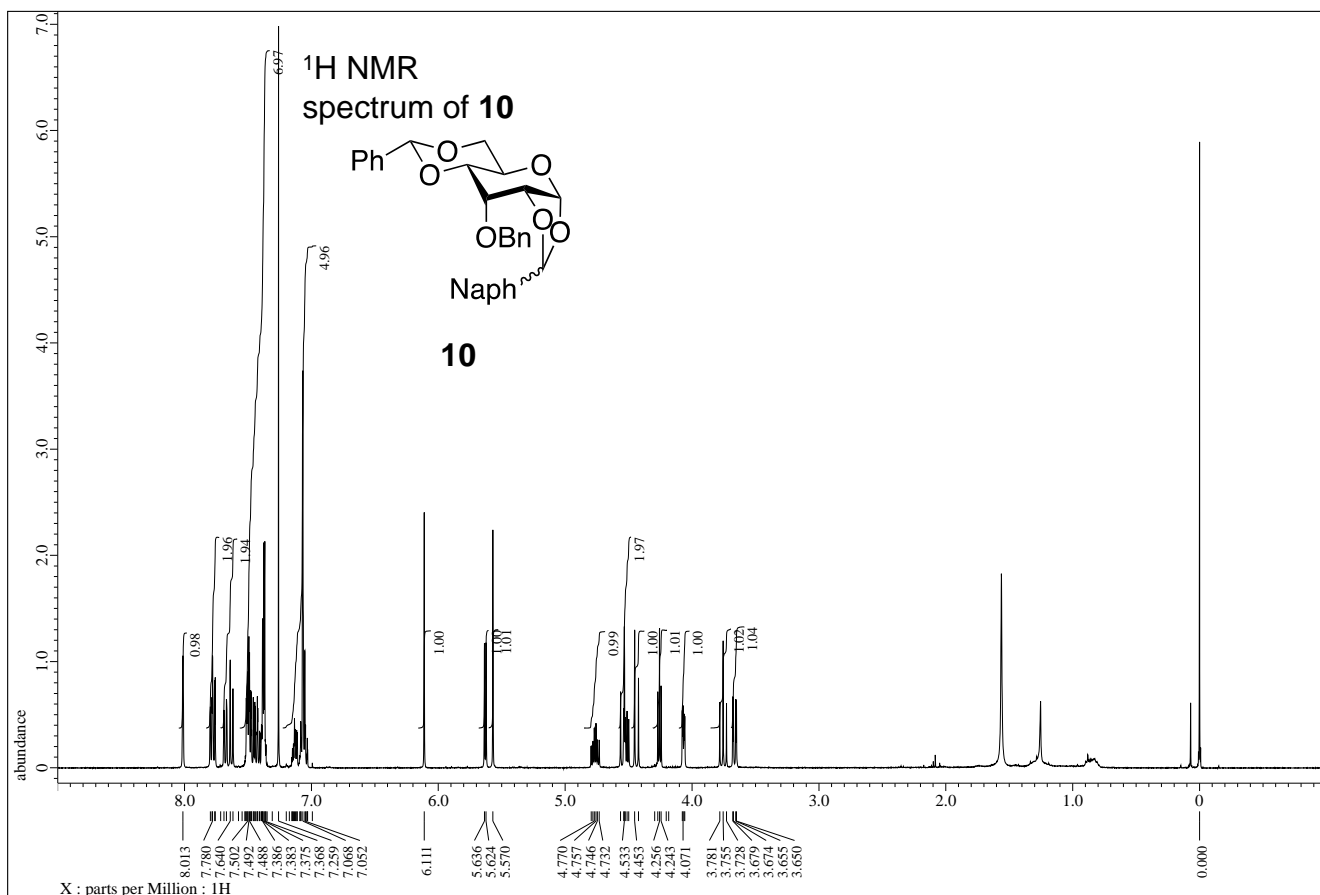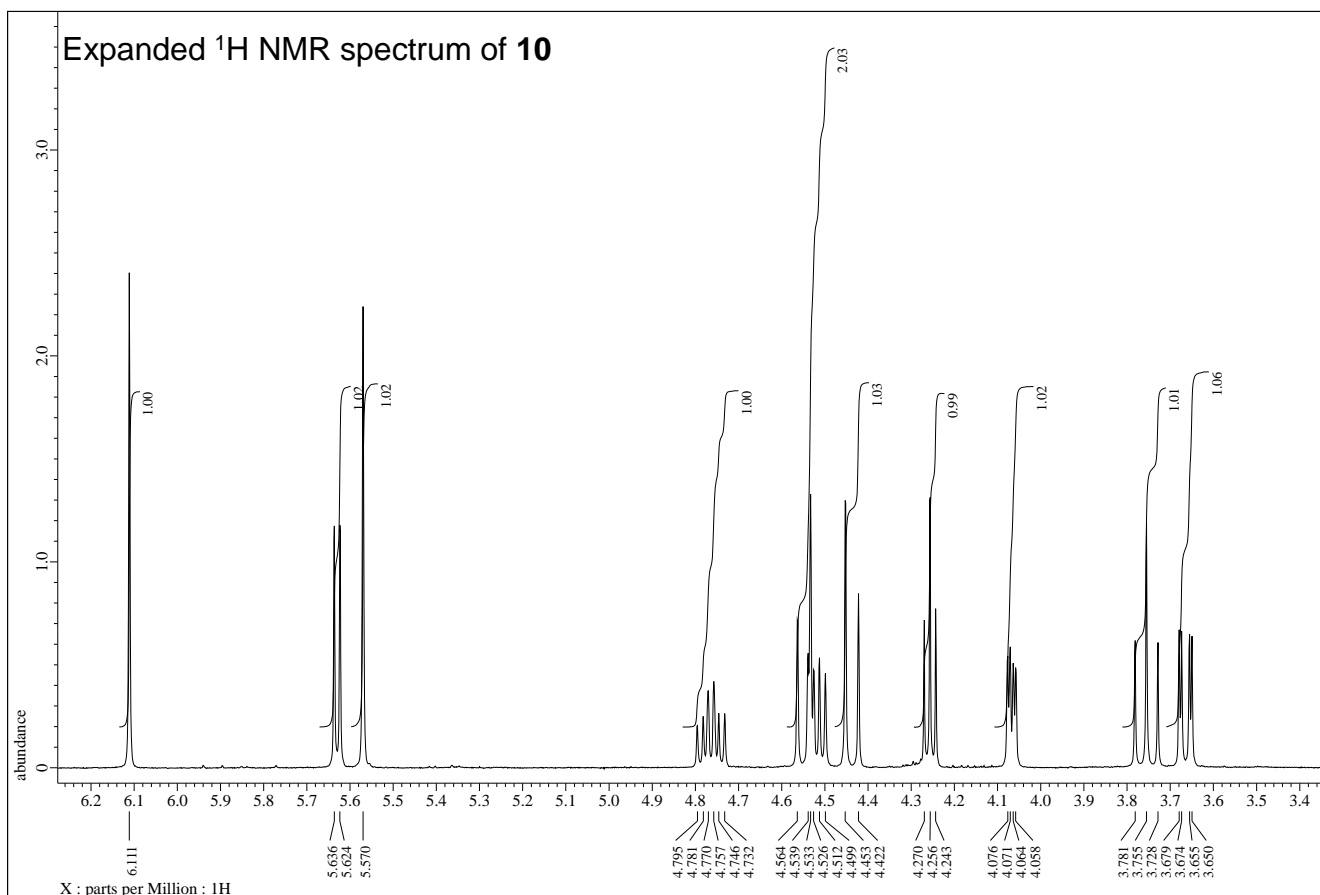

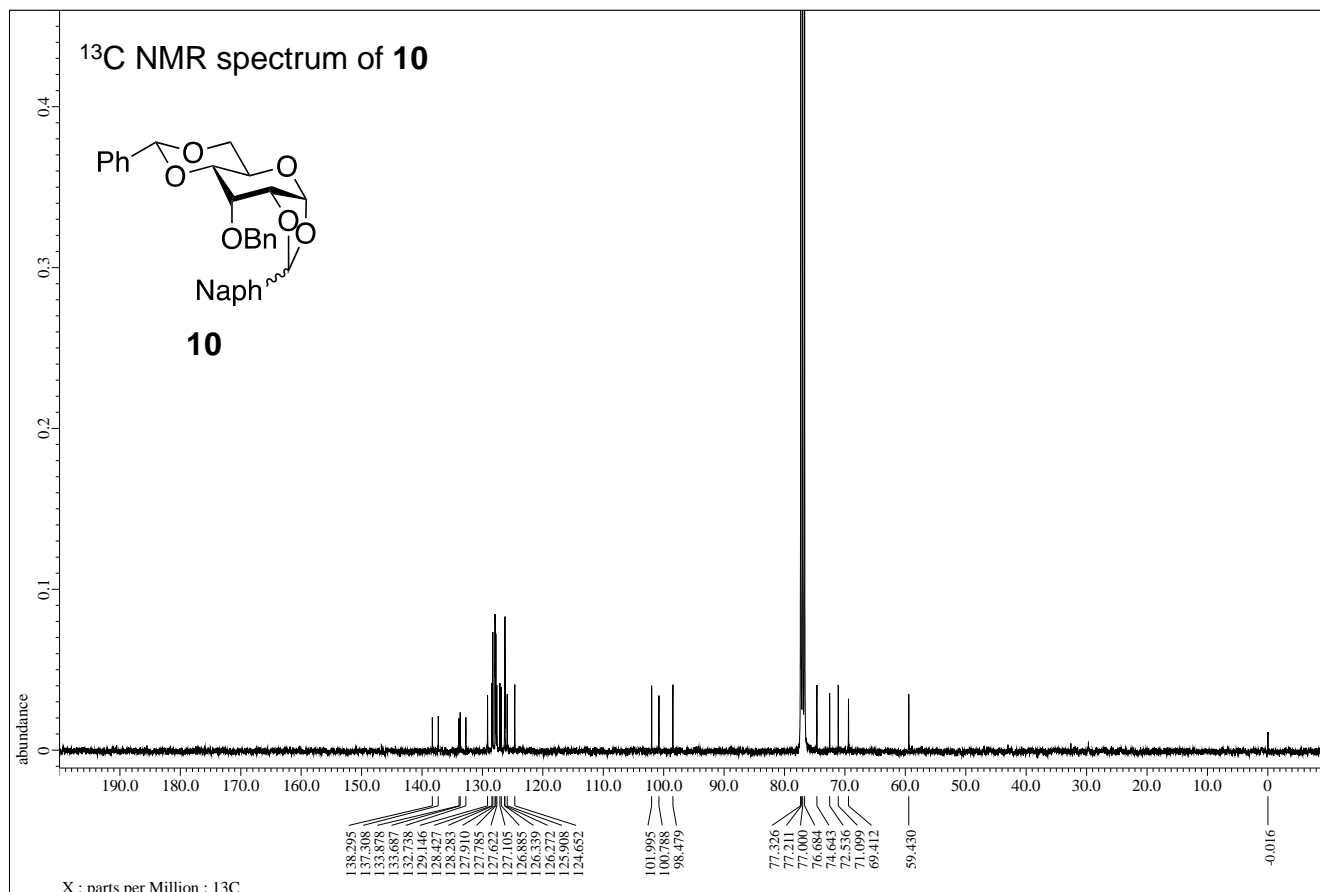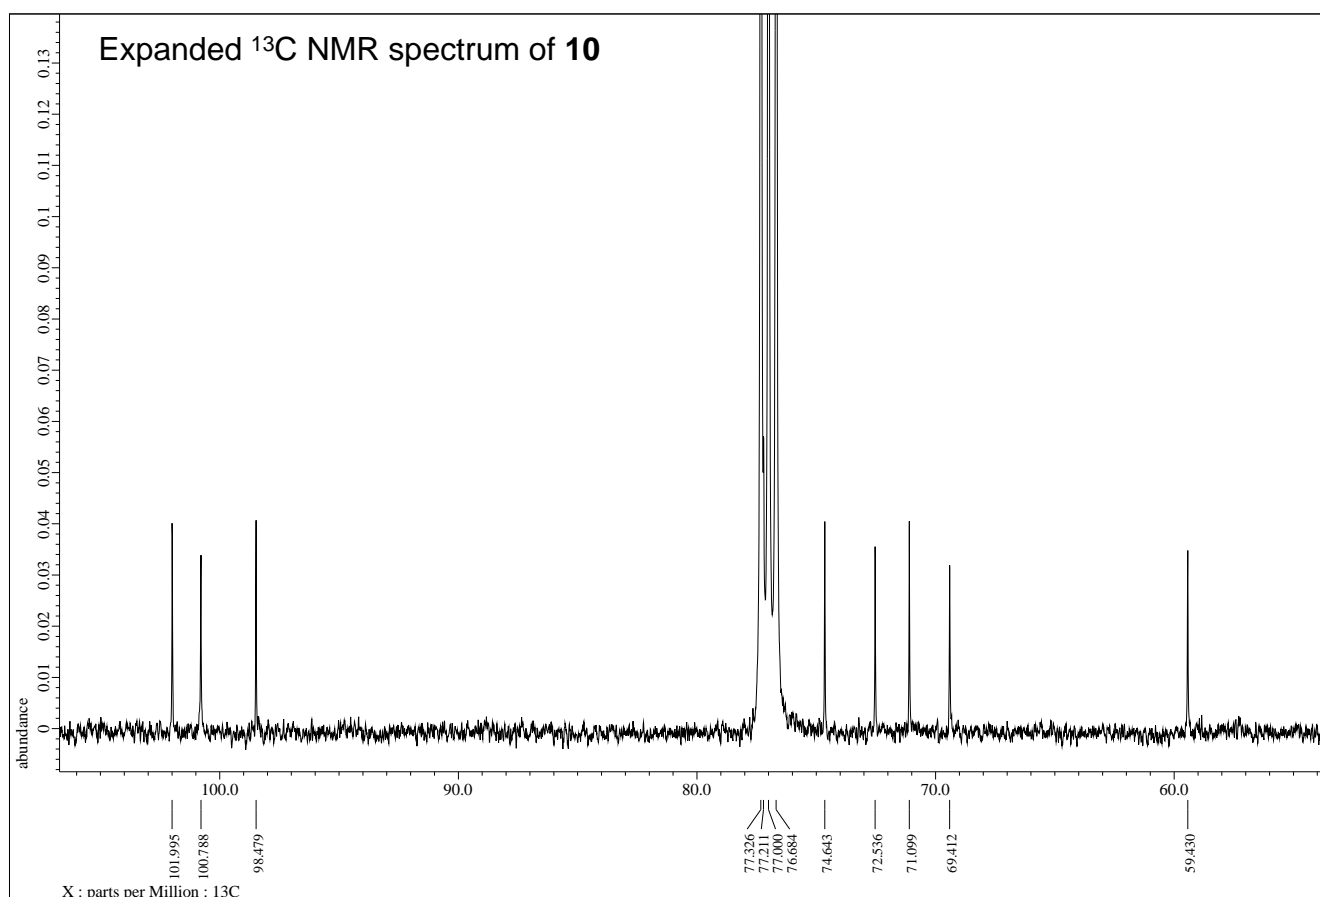

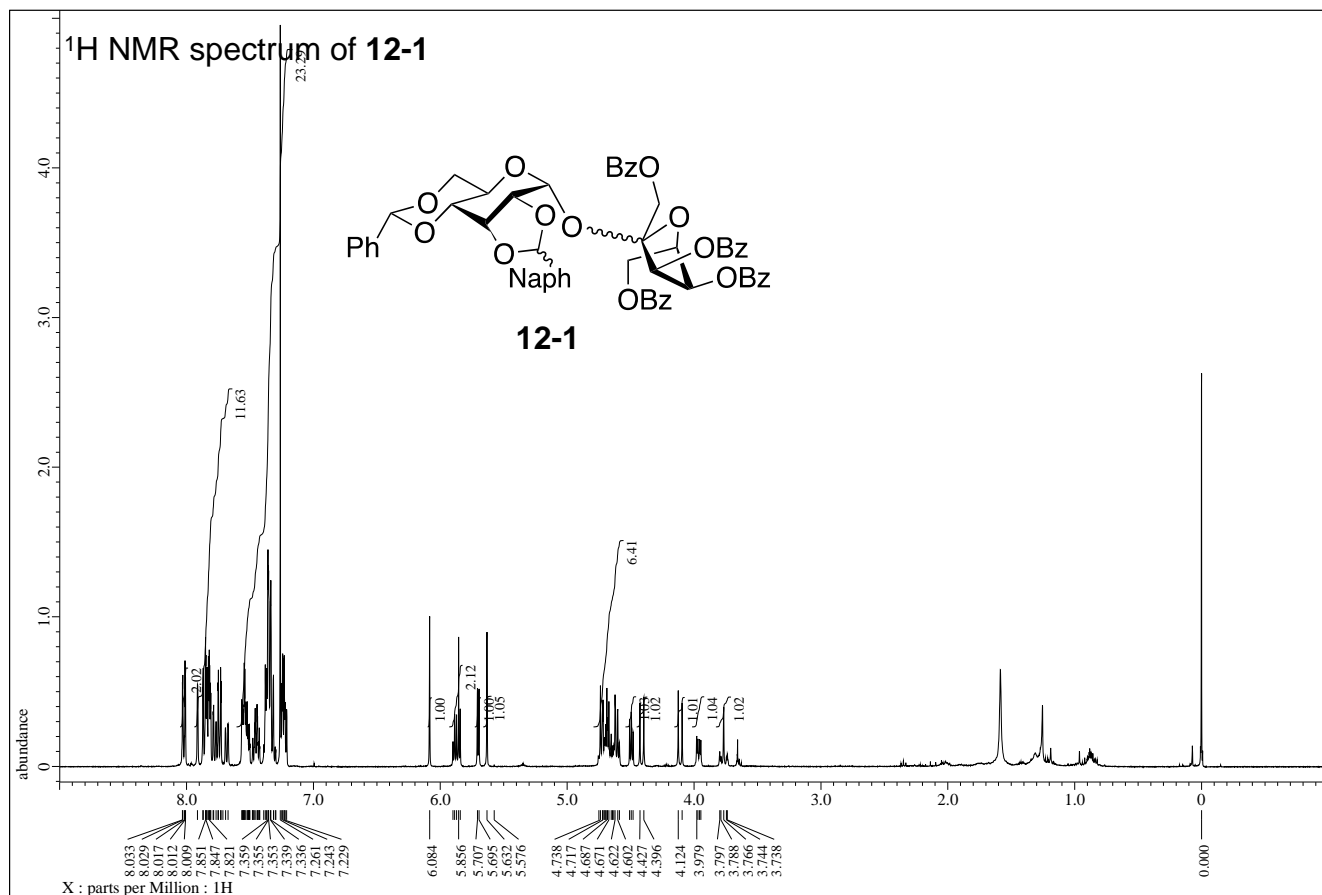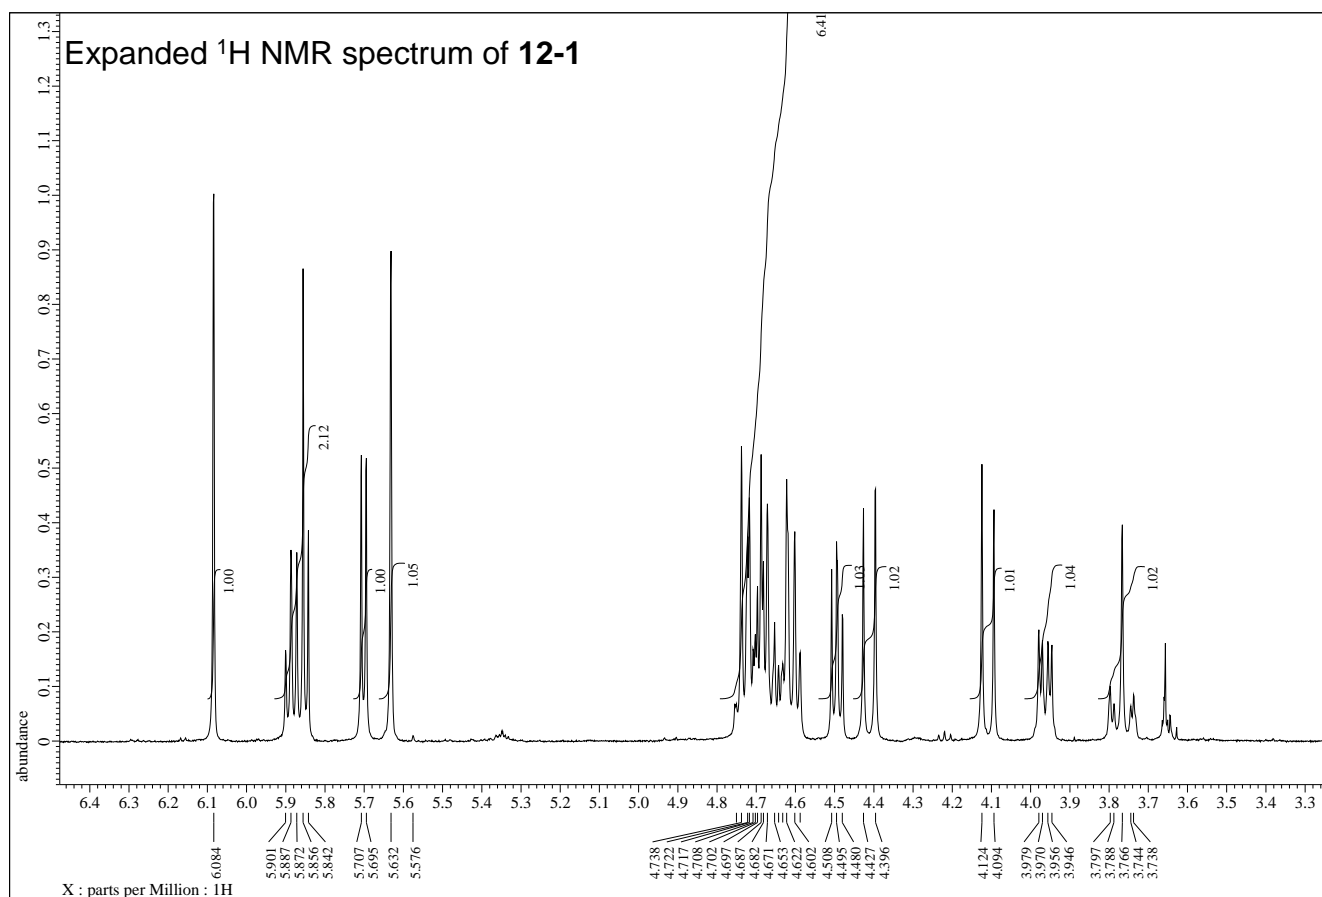

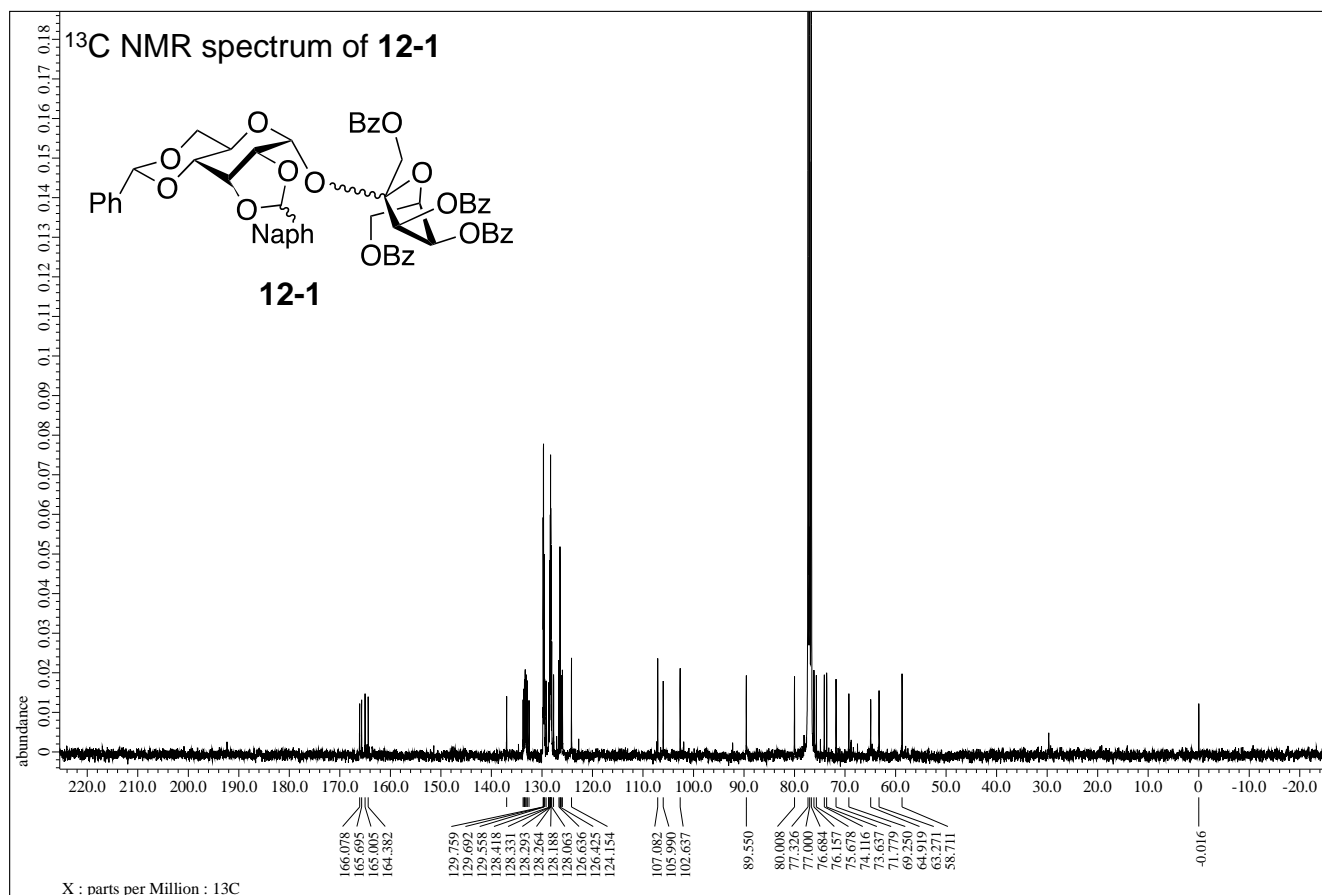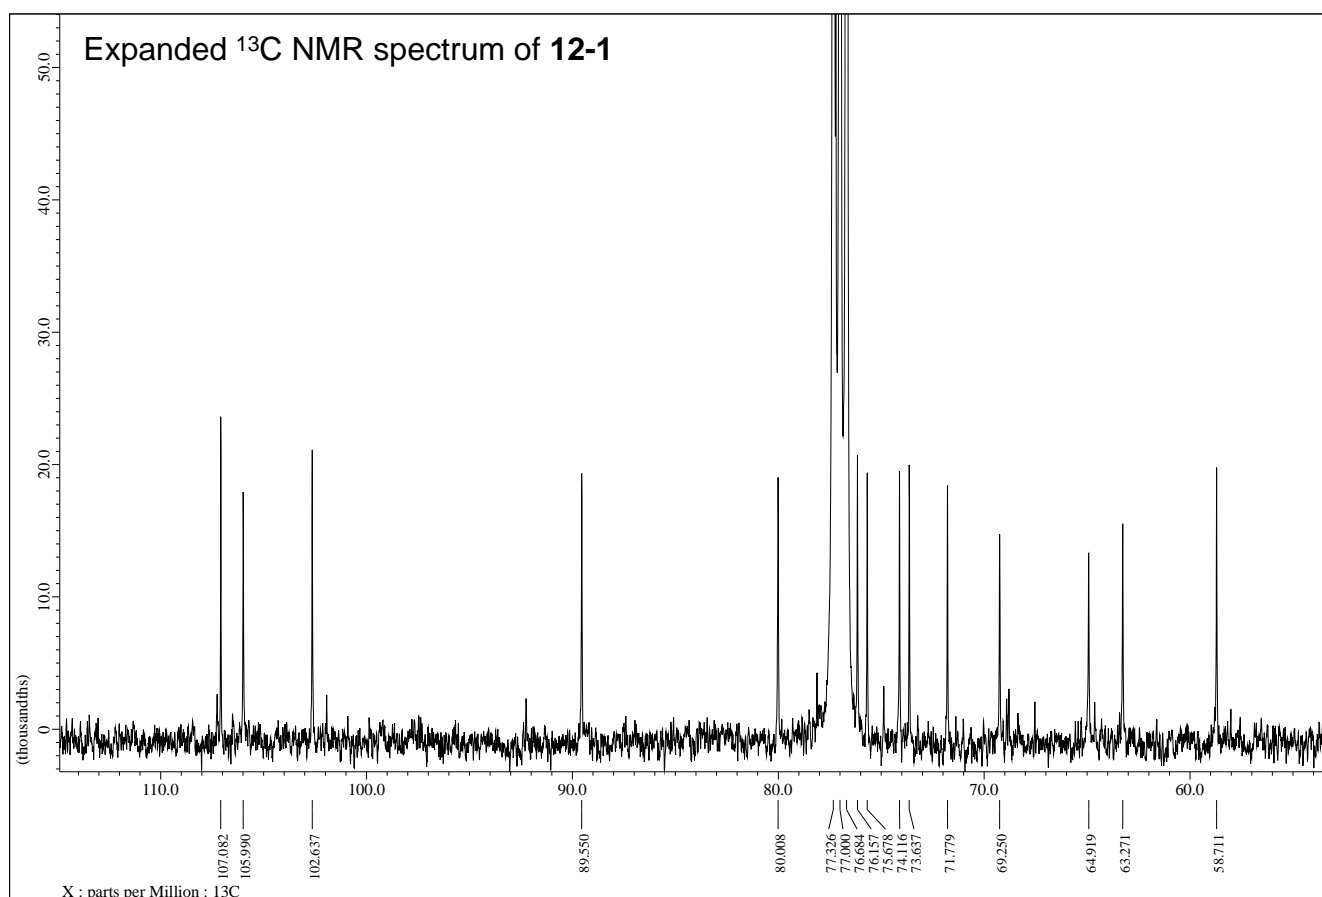

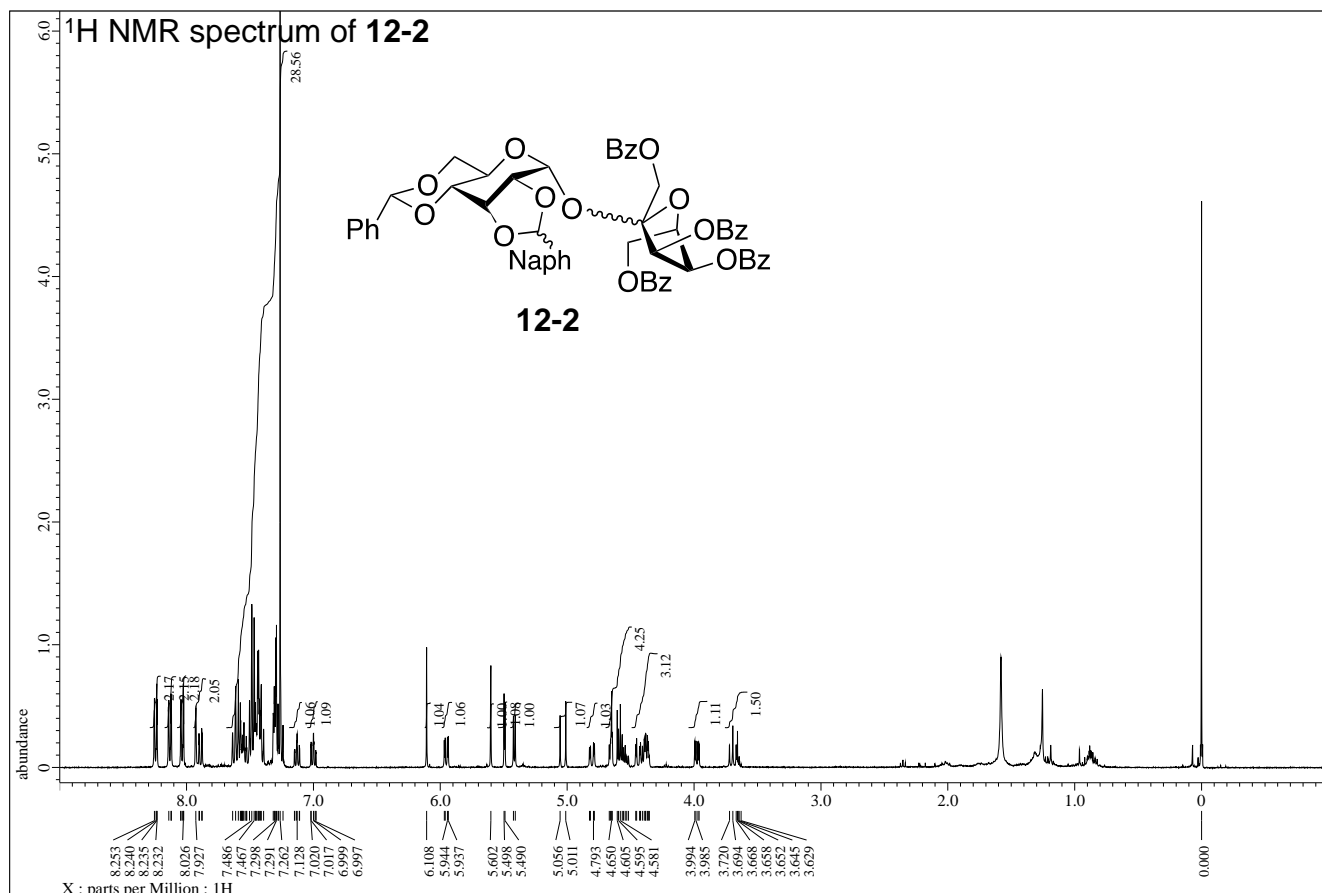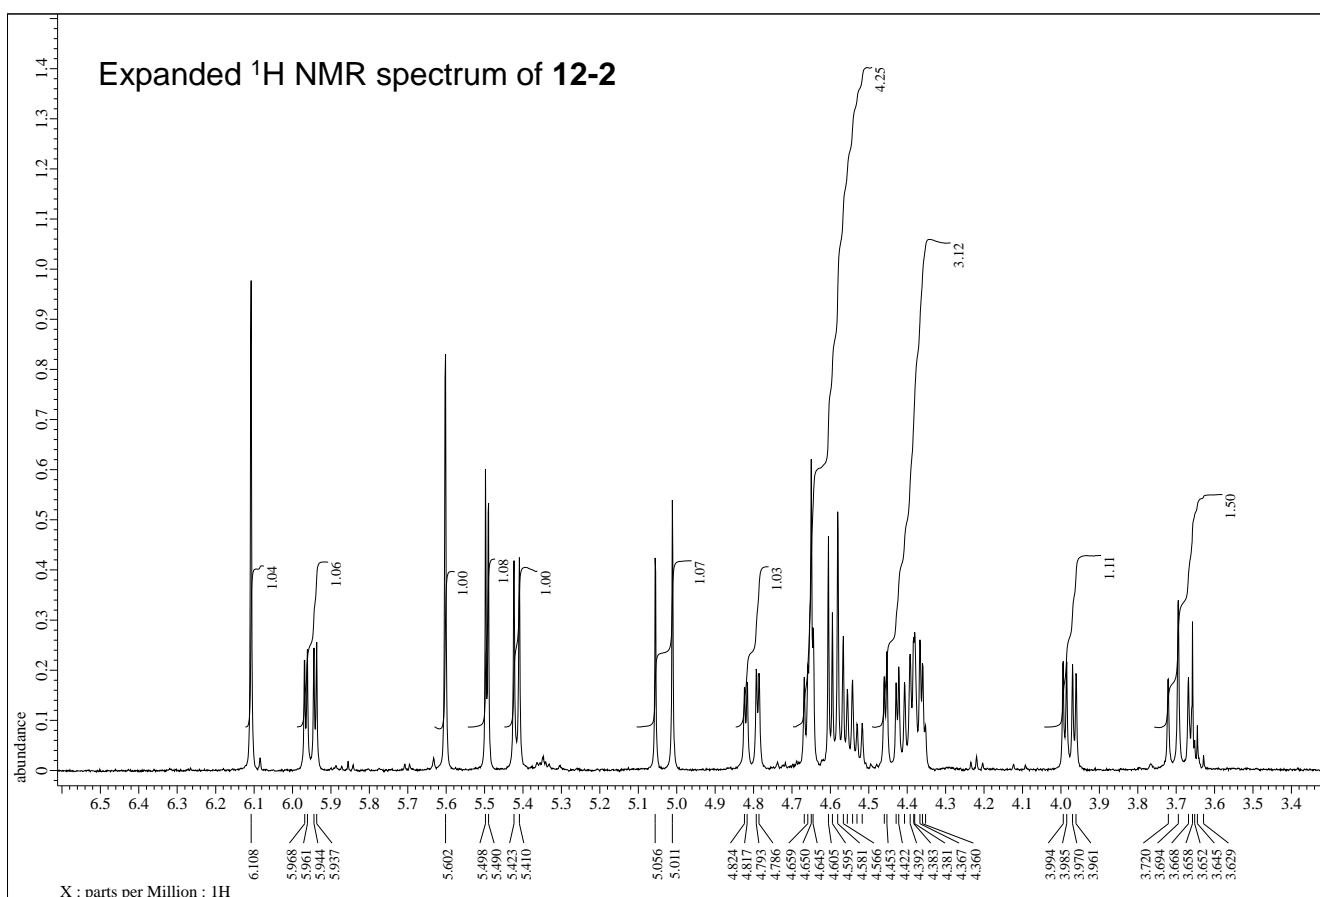



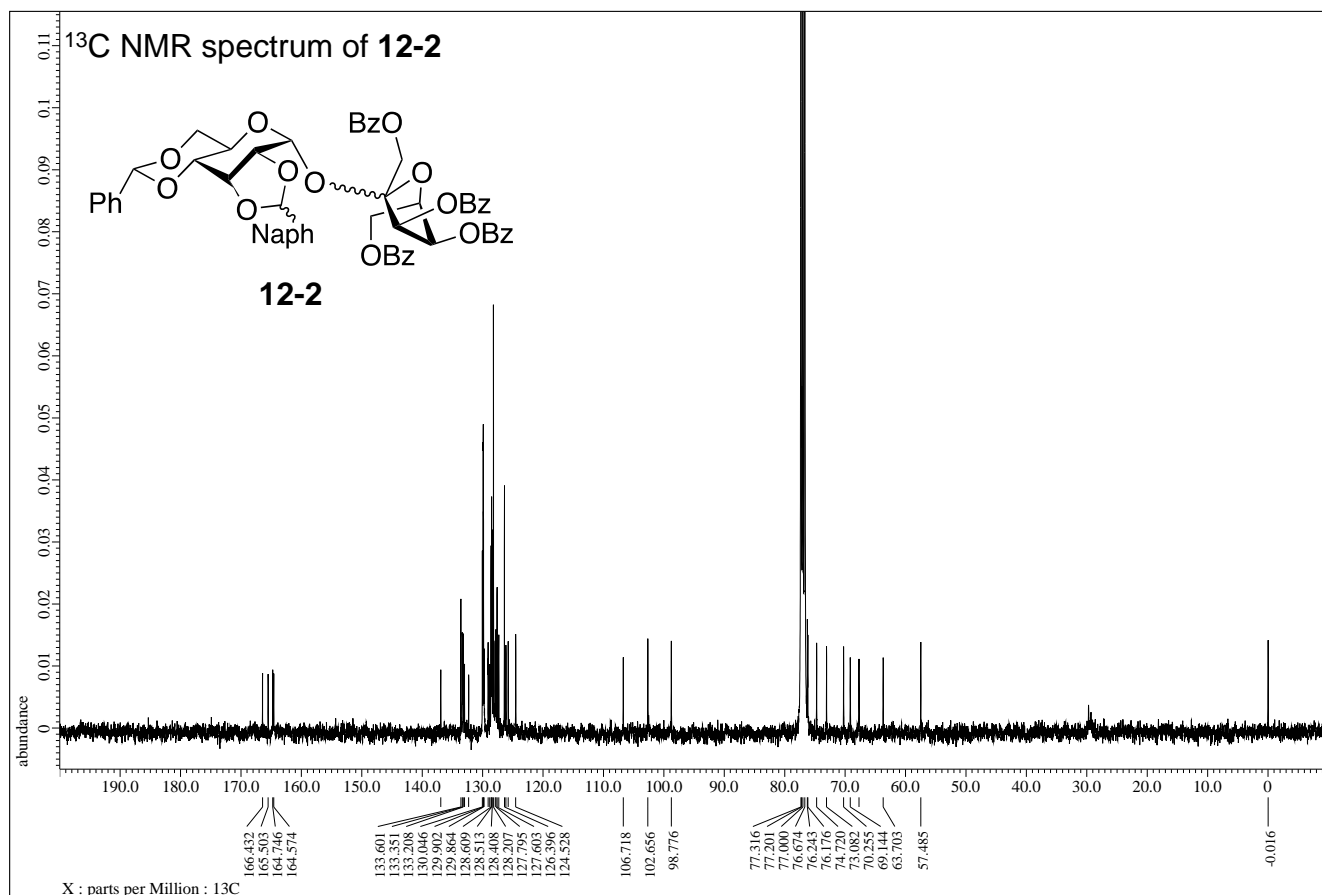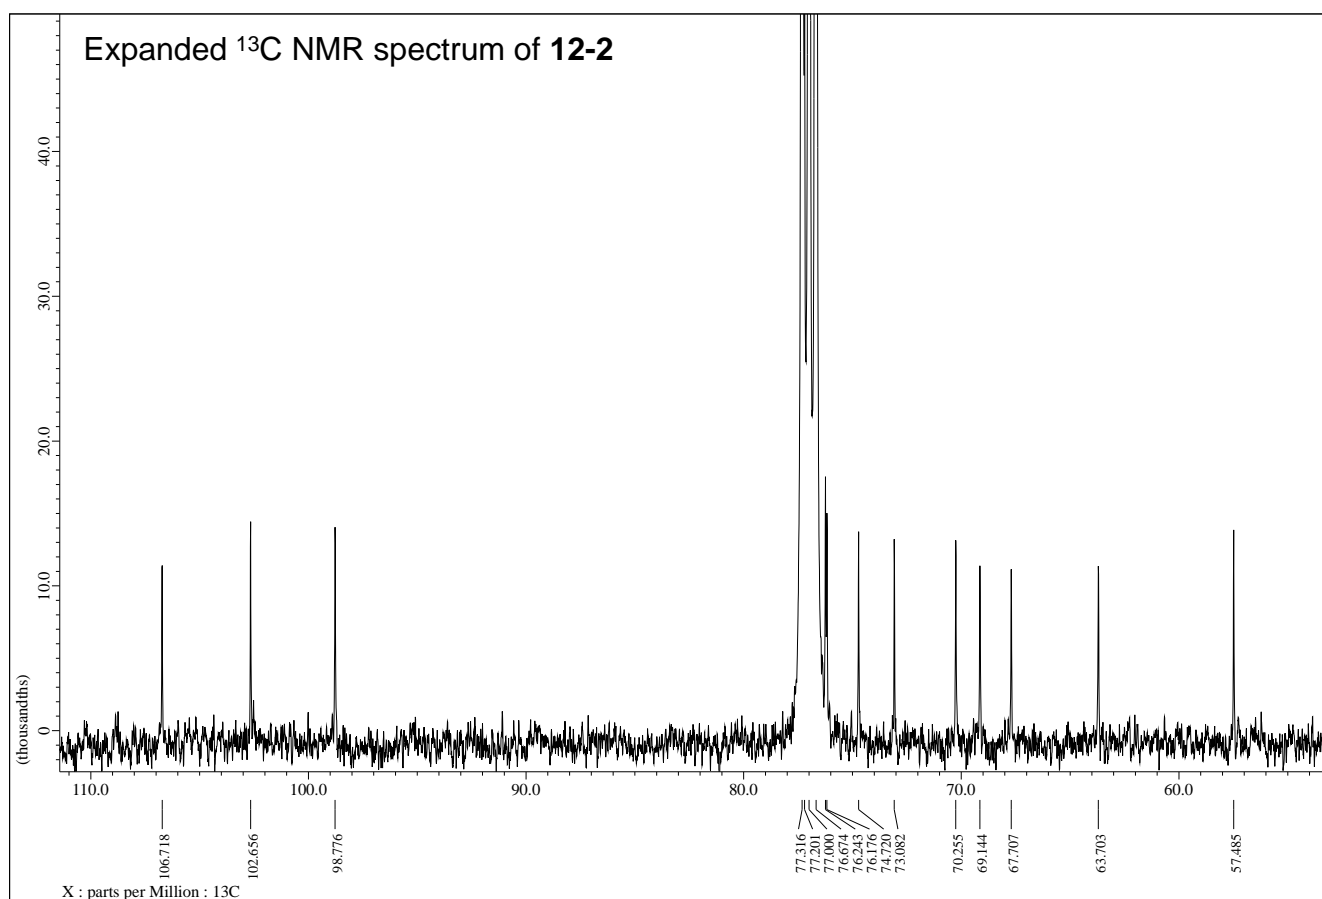

# <sup>1</sup>H NMR spectrum of [1·BzONa]

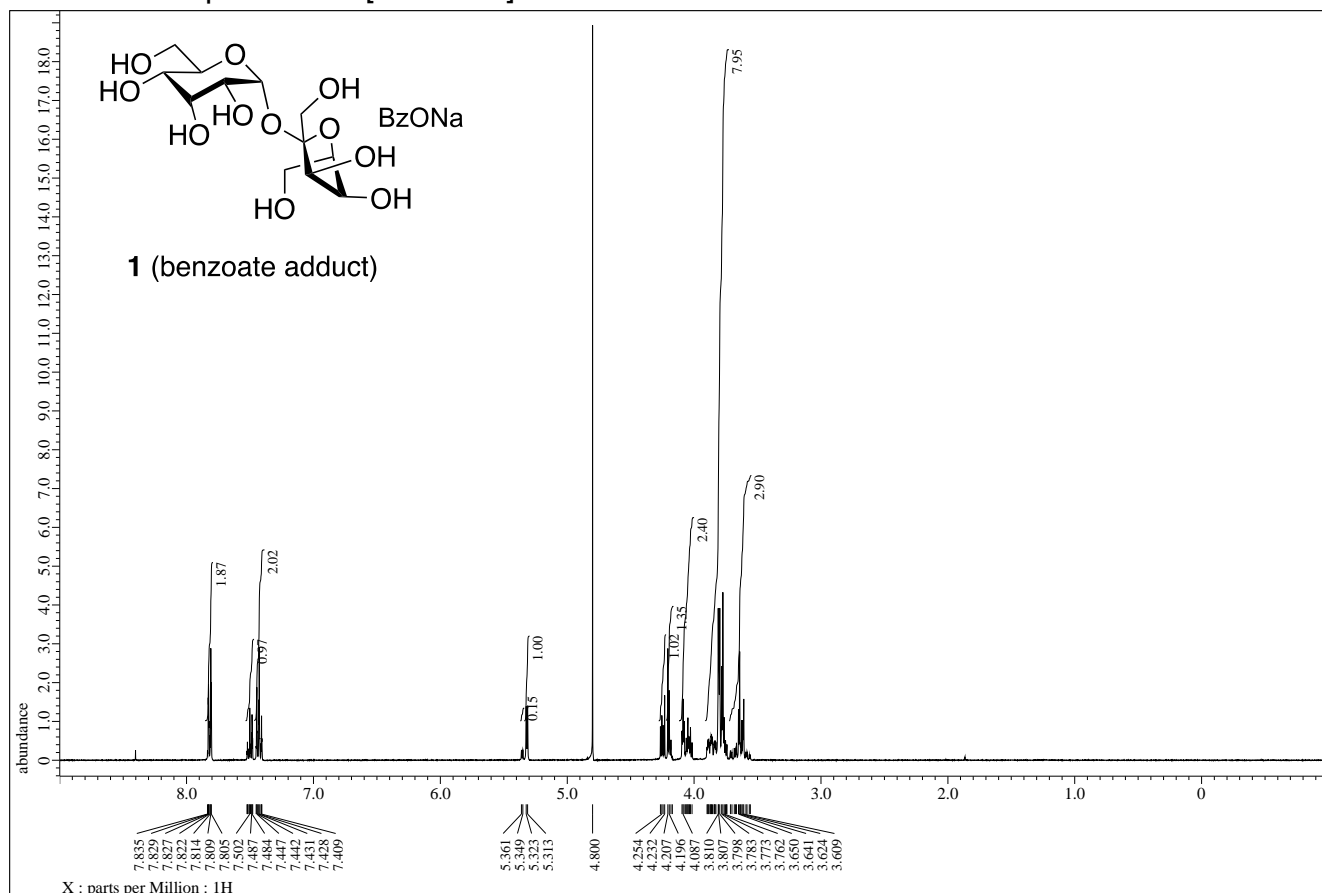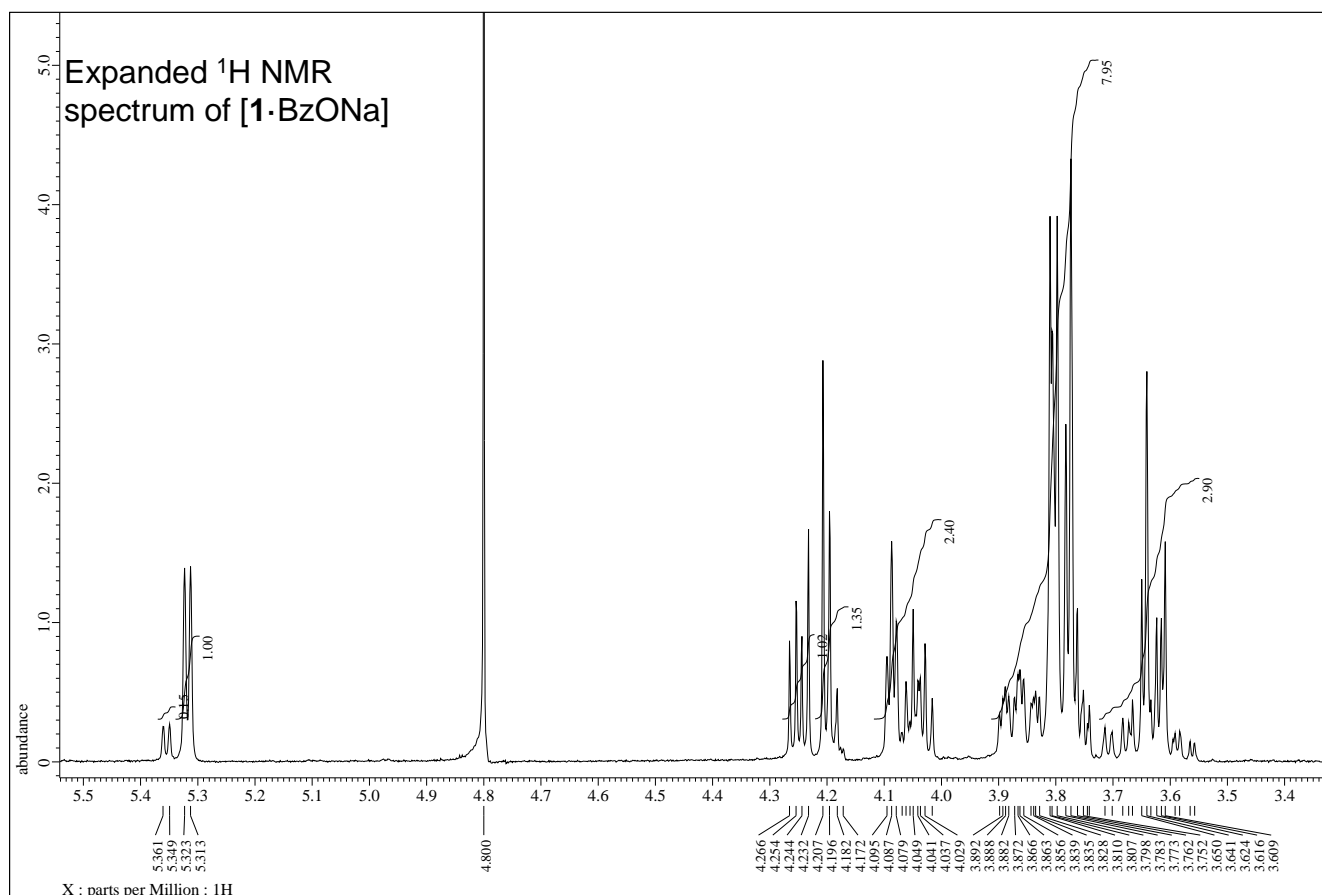

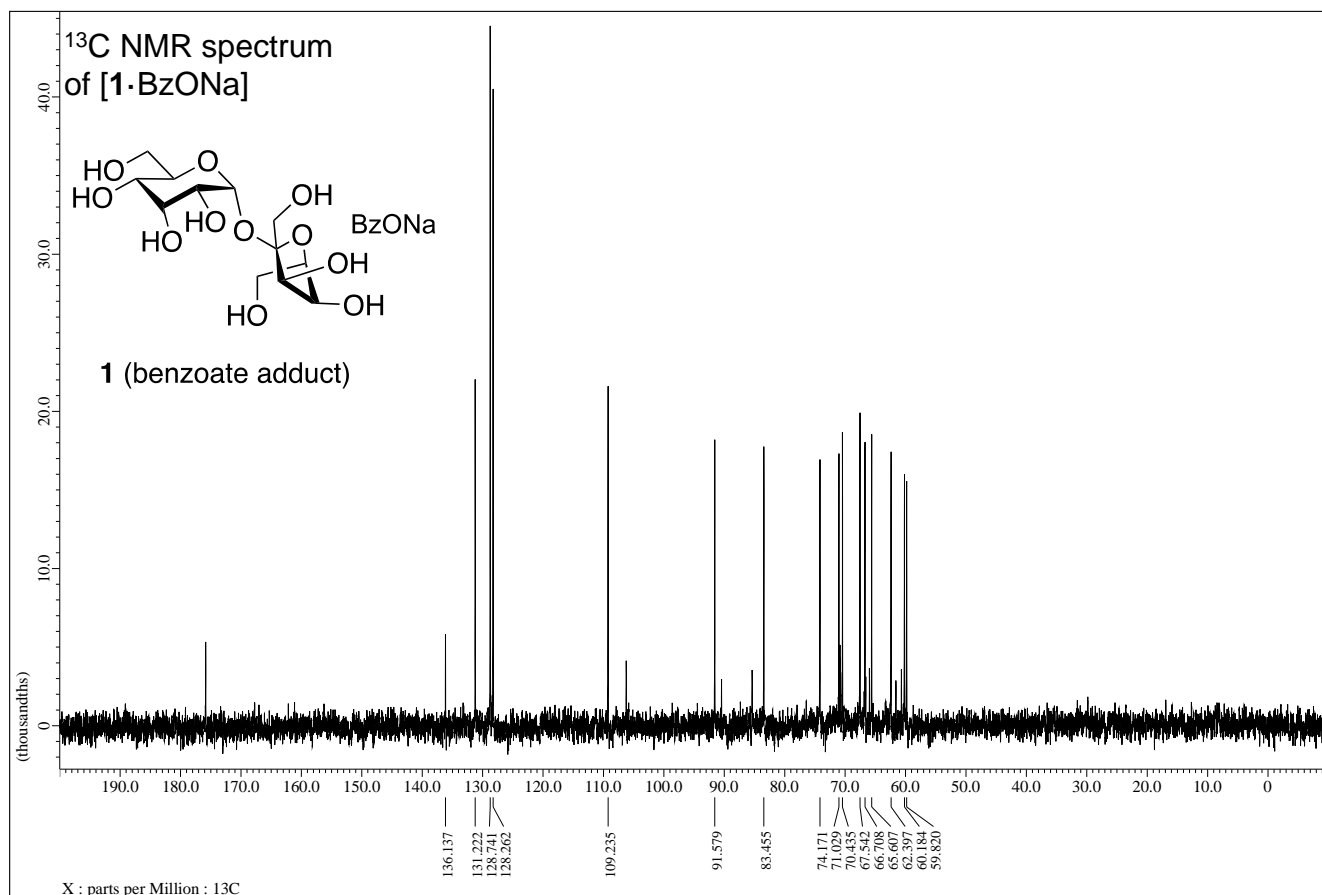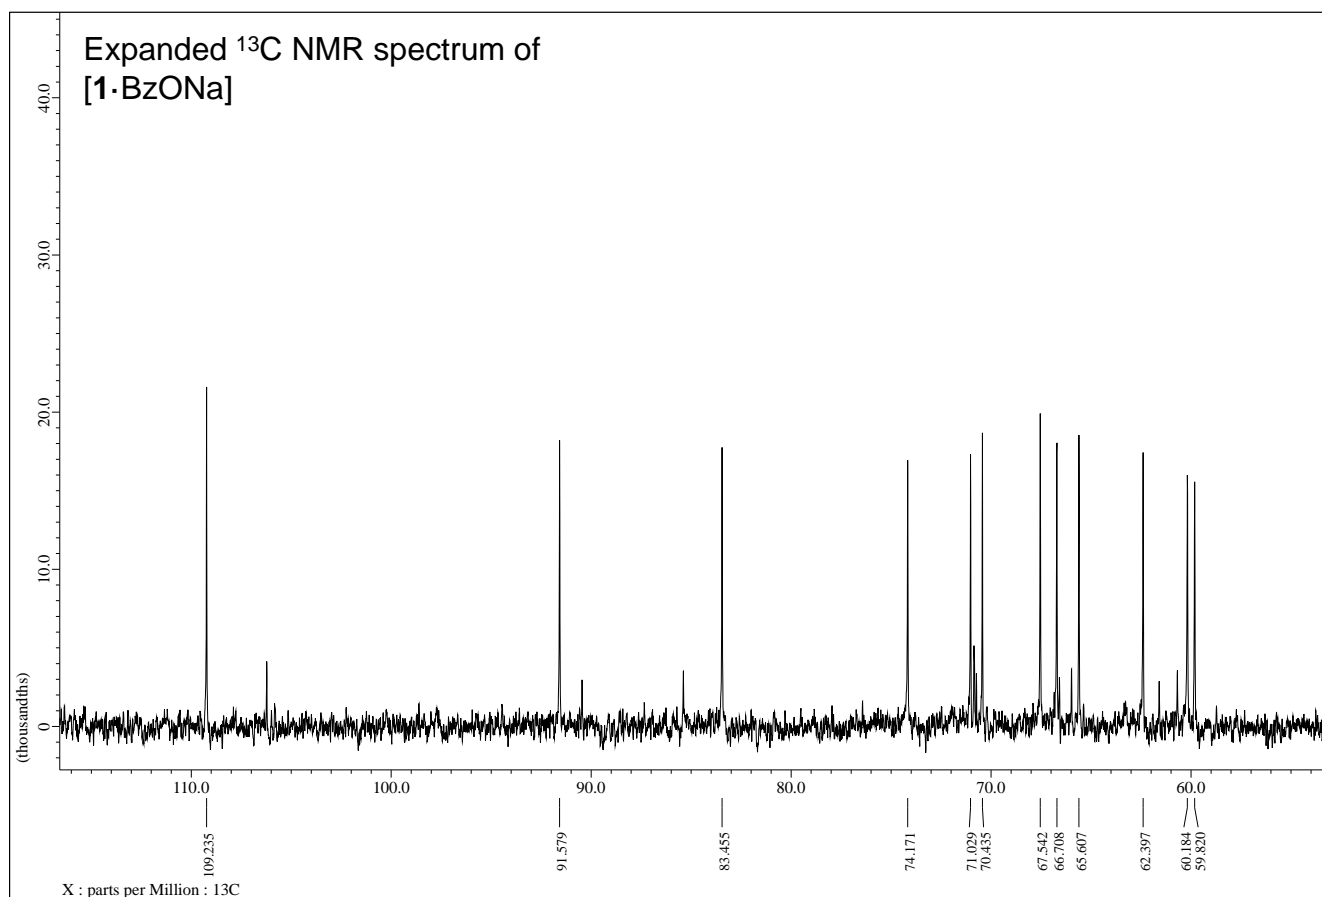

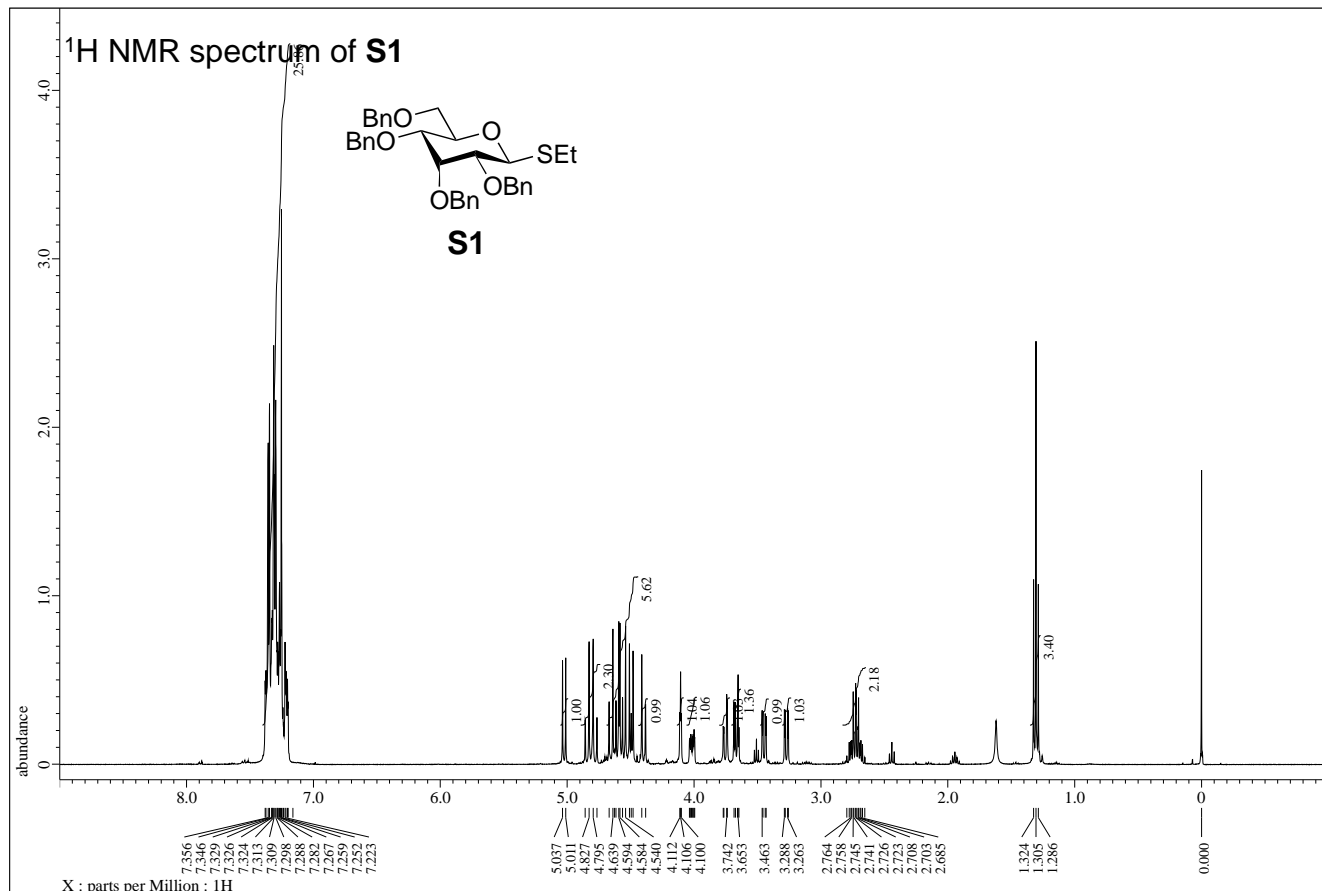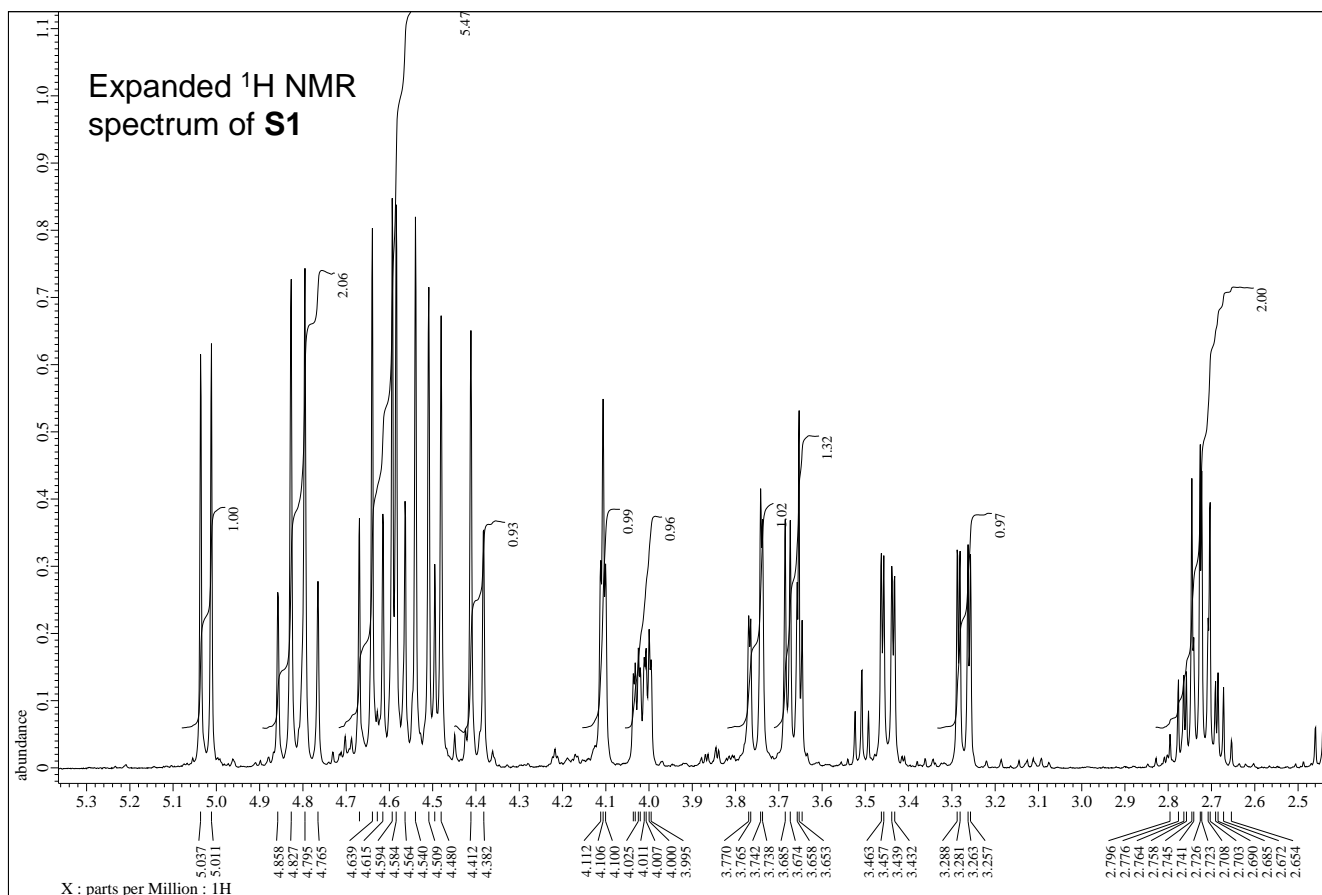

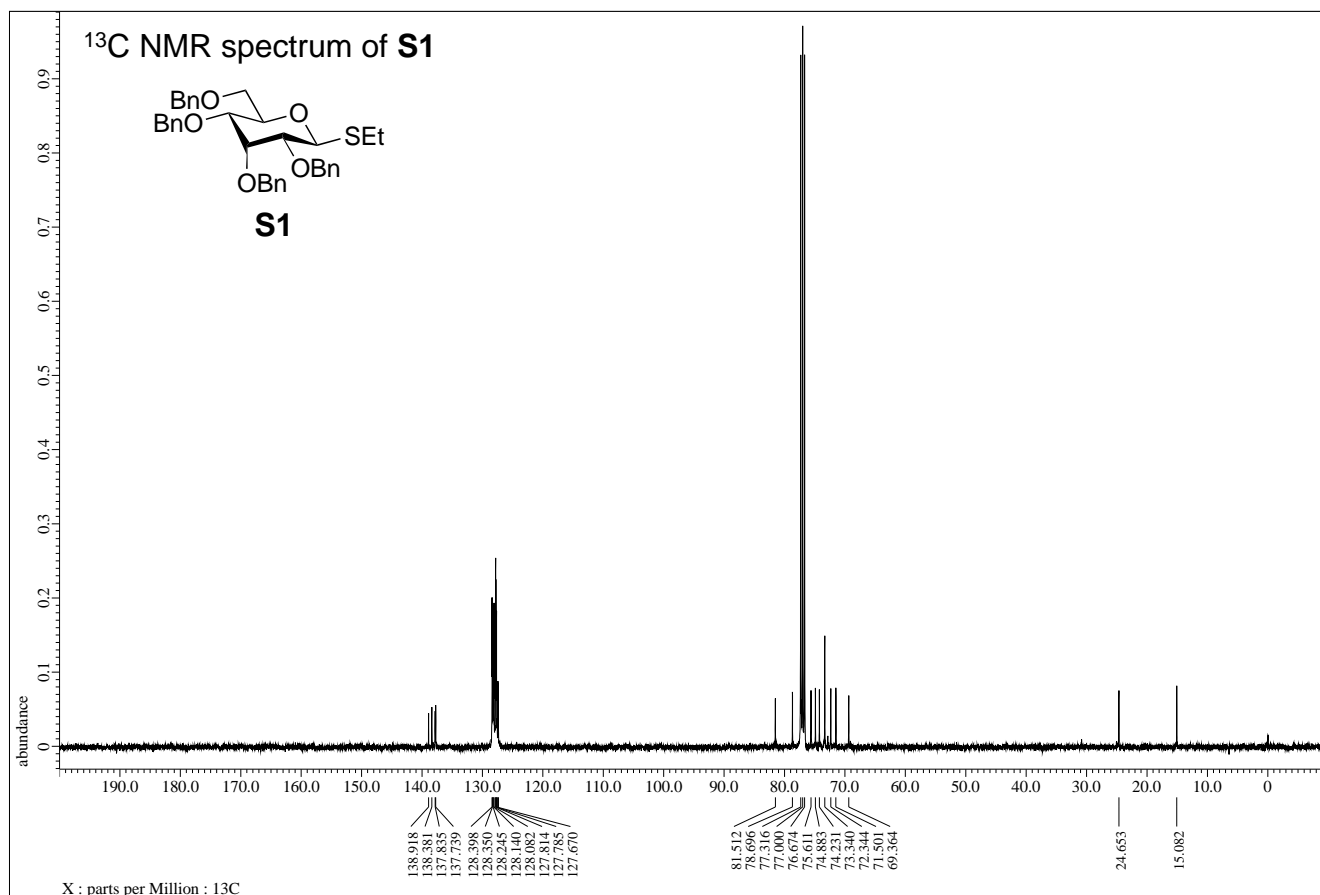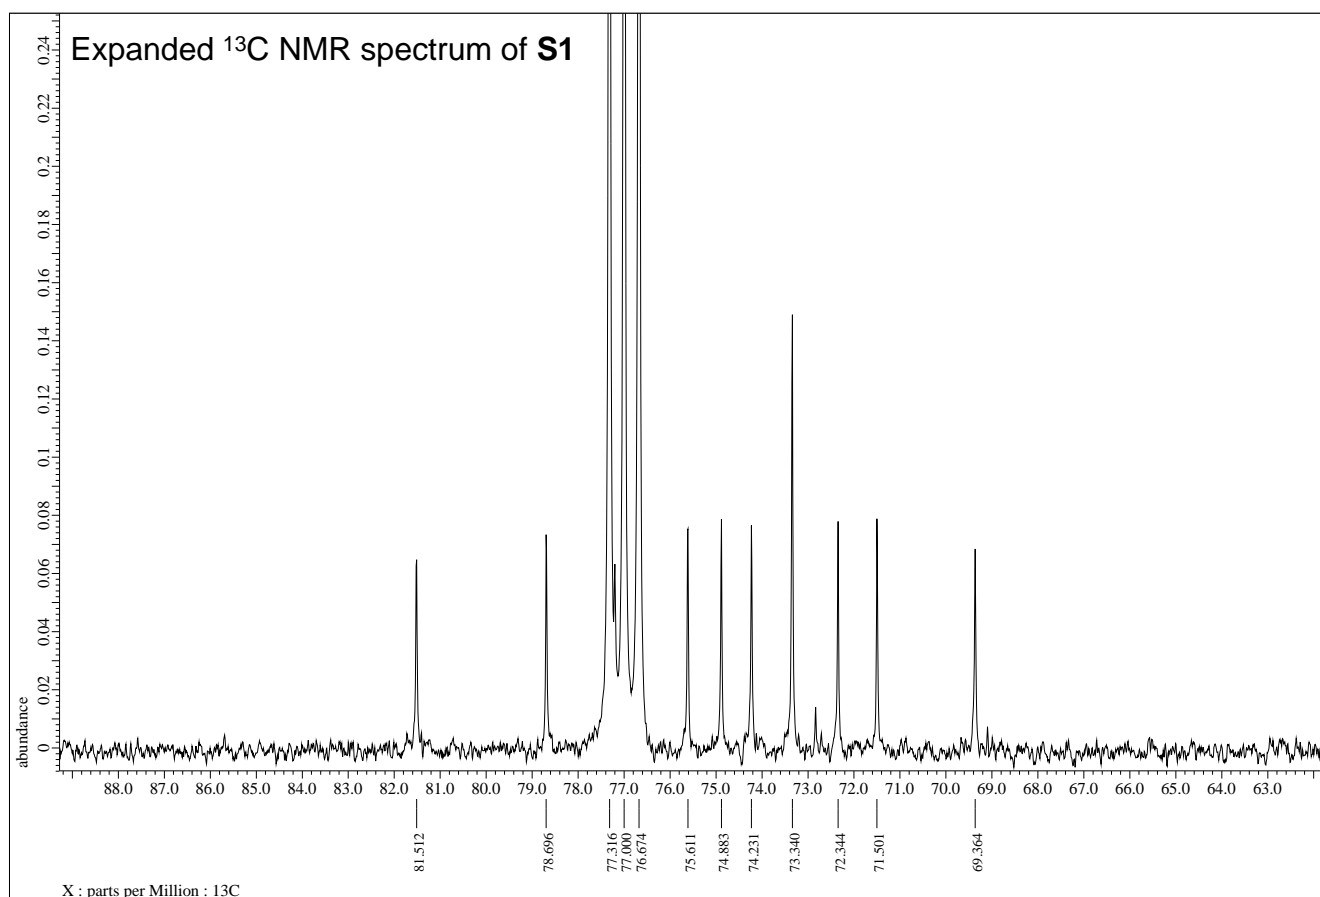



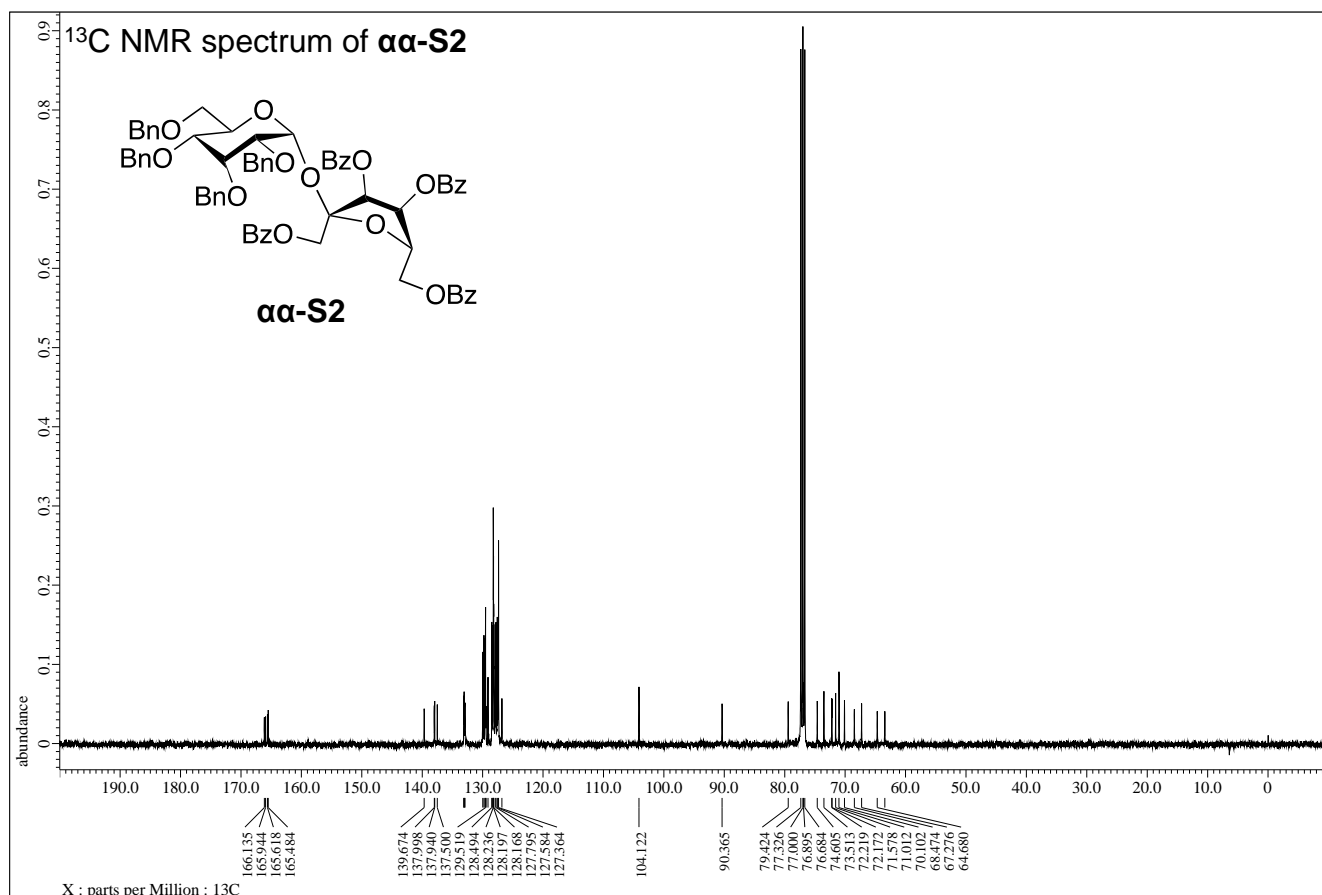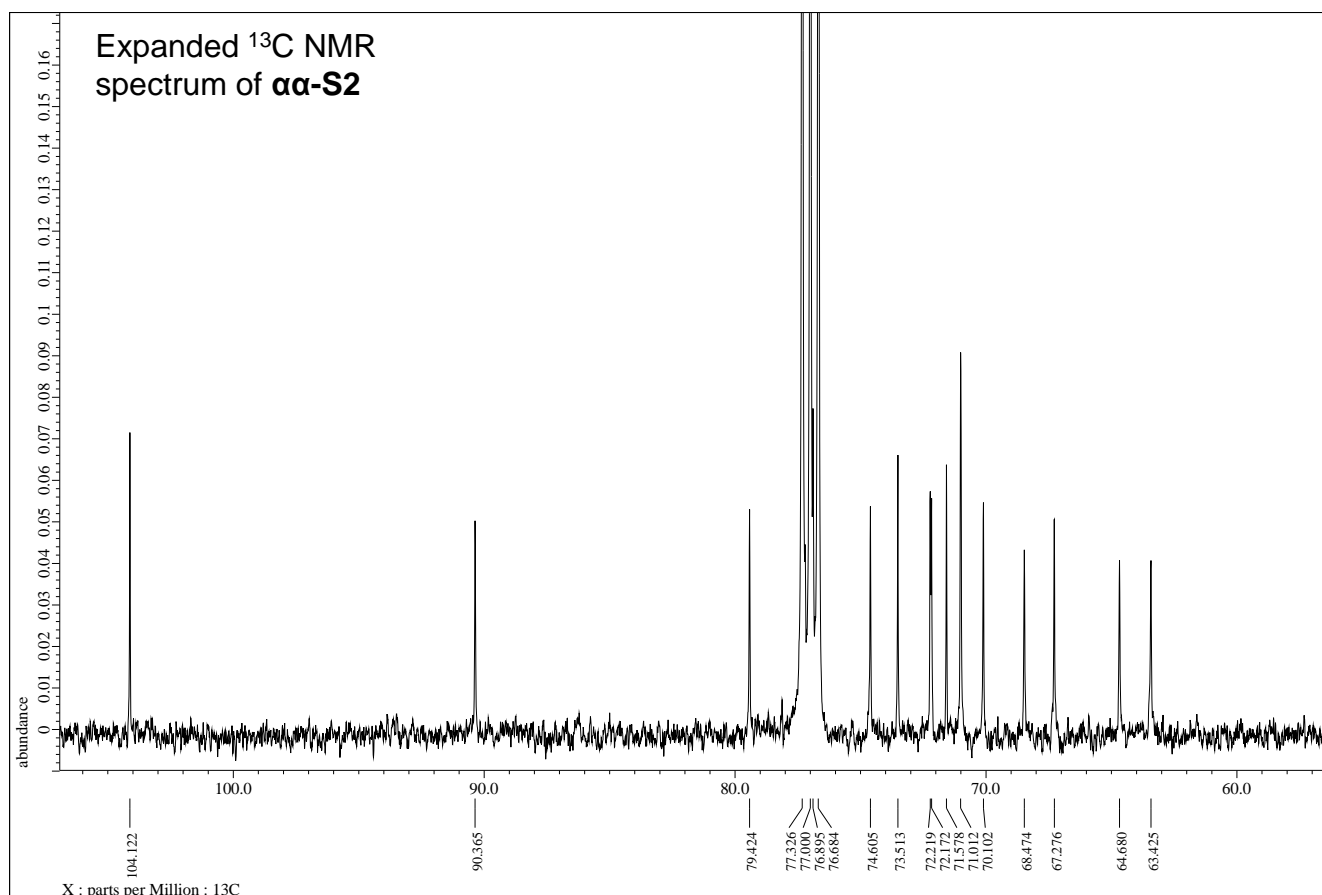

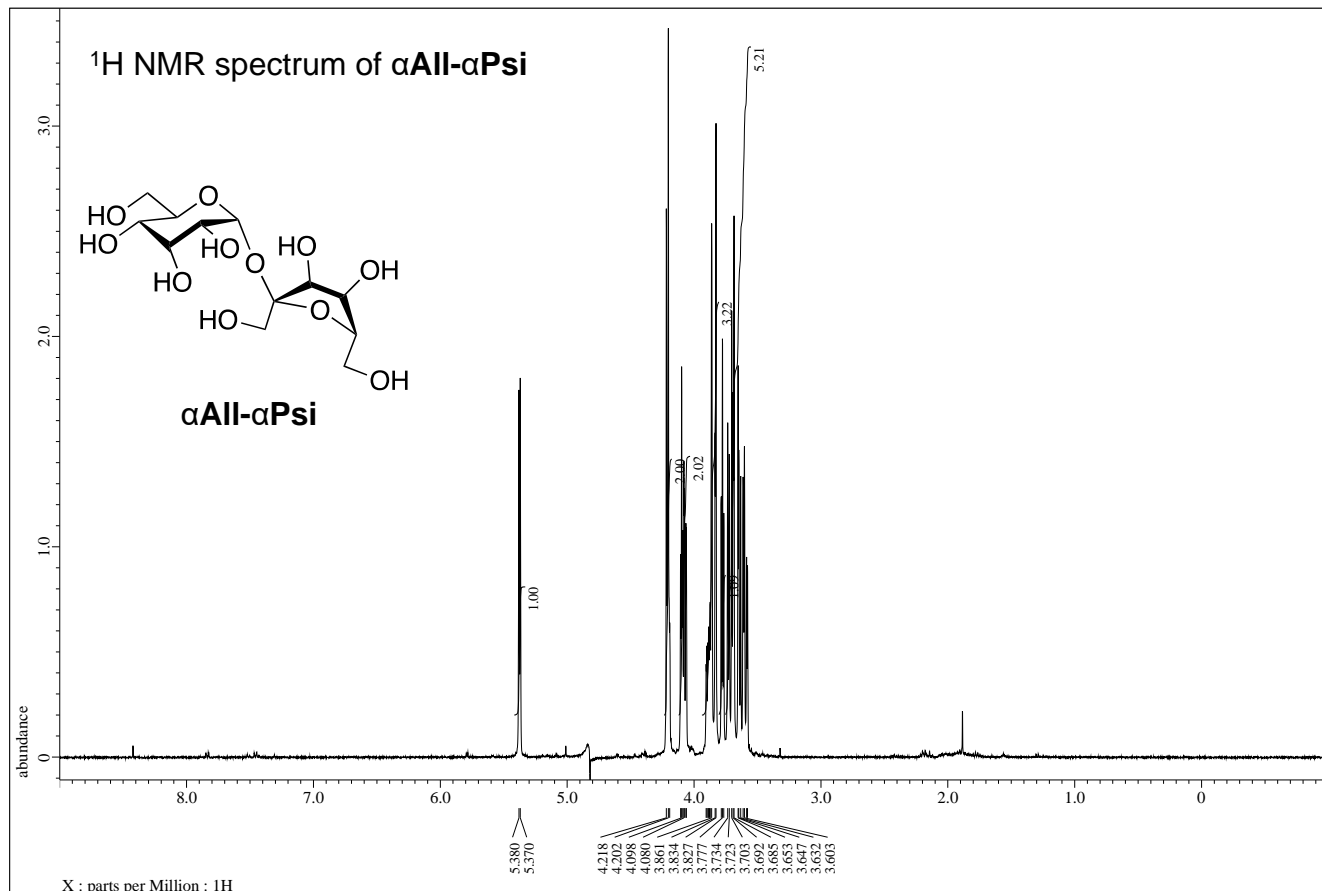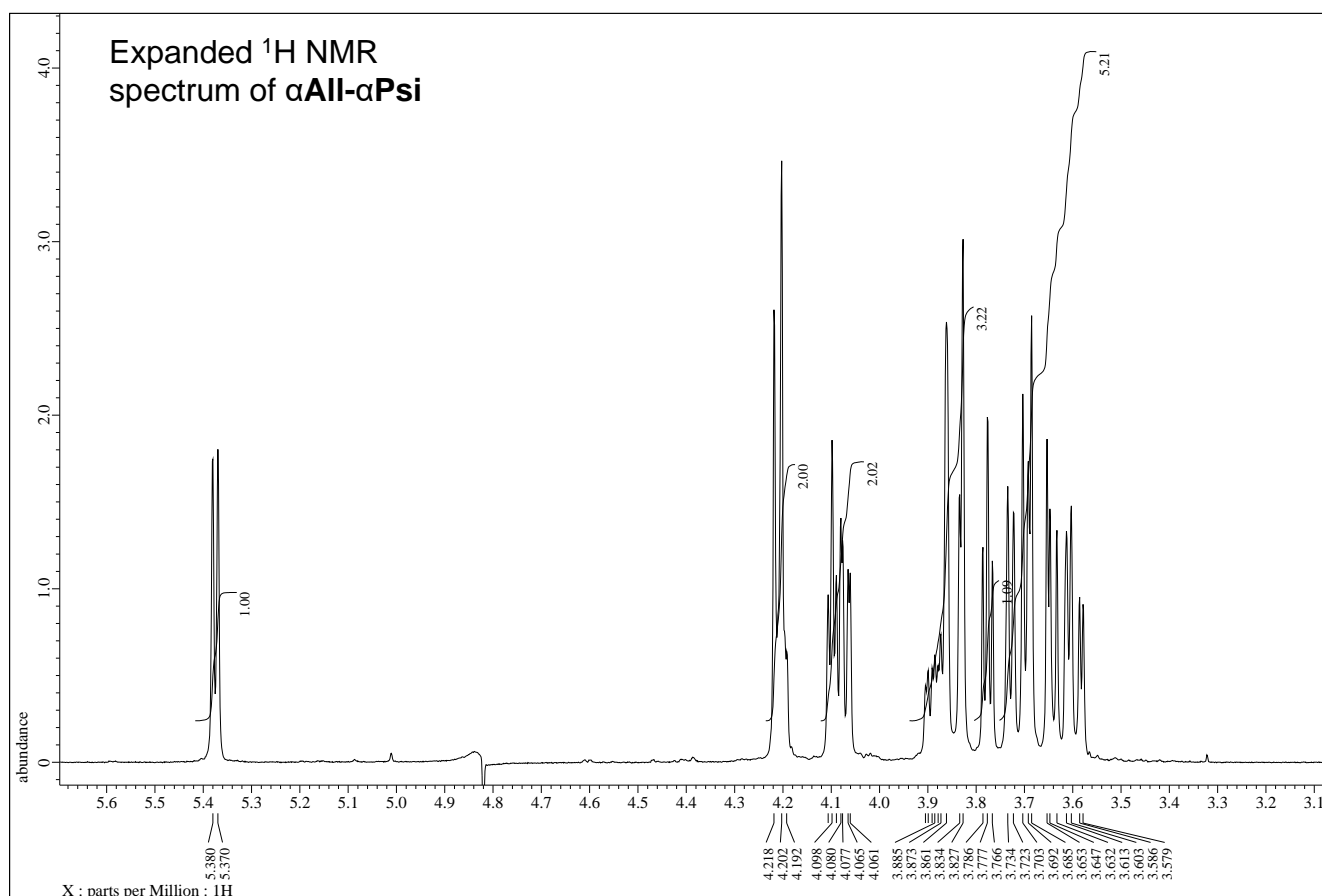



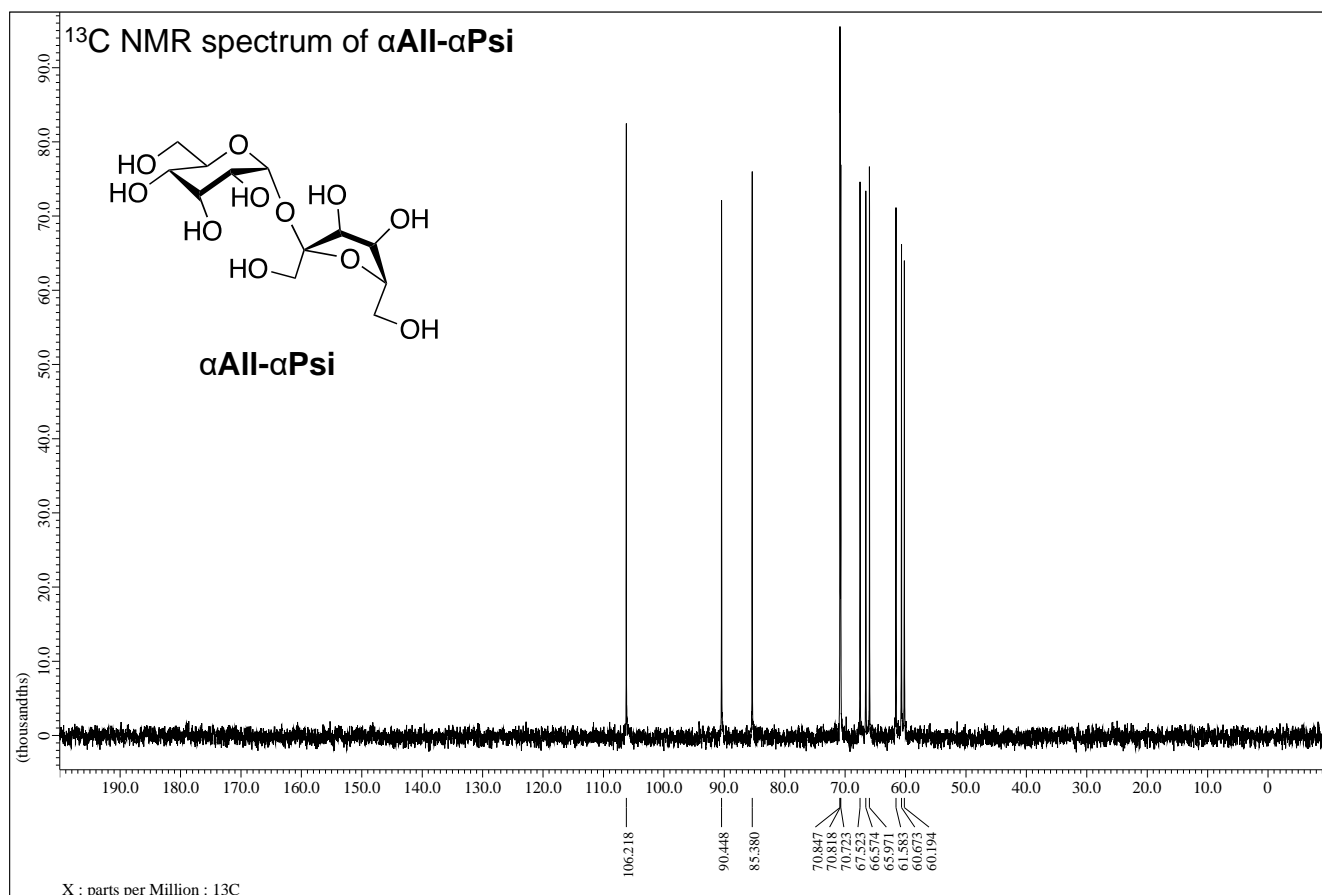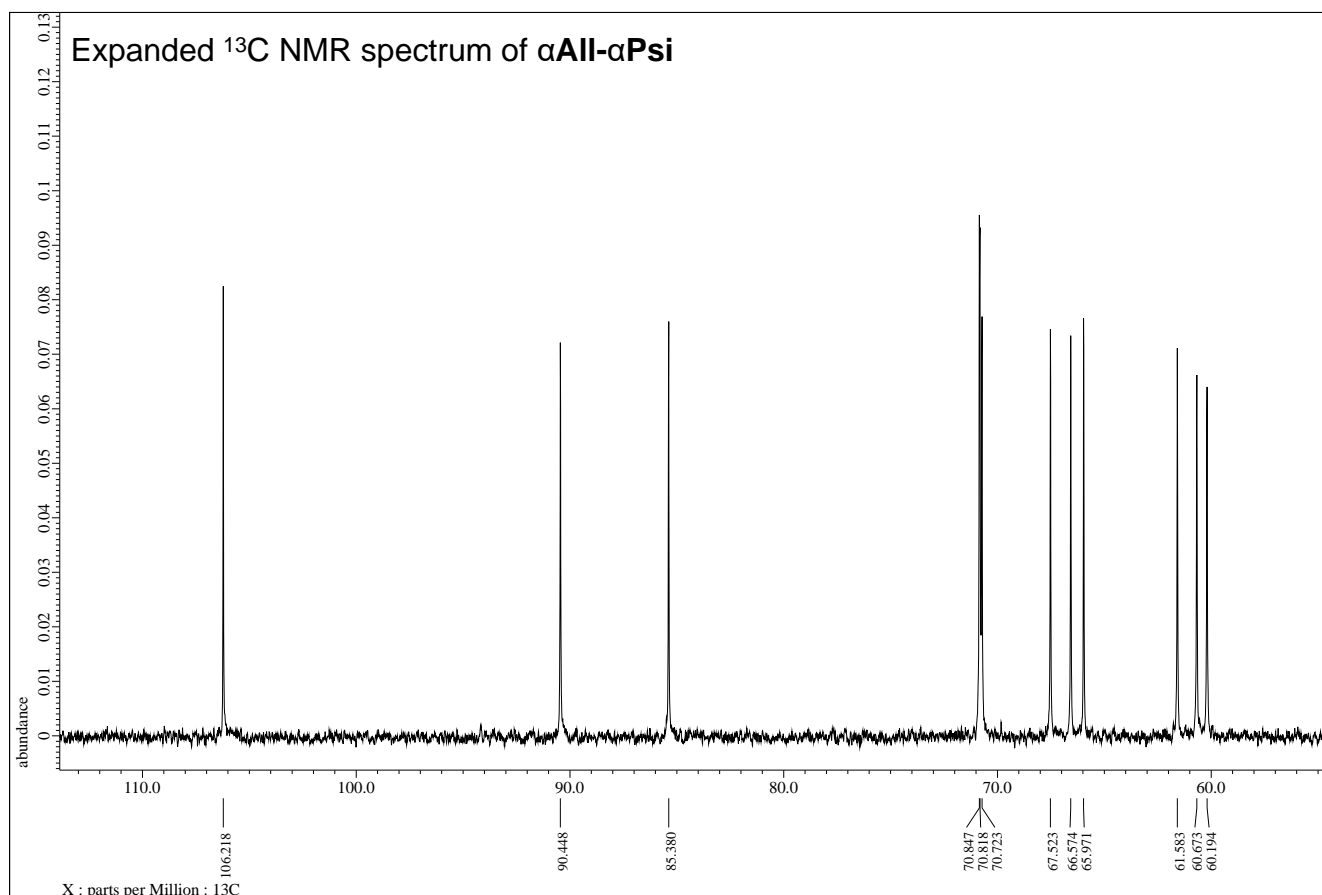

Supplement: s1 [file s1]
